# 1 **A perturbation model of the gut microbiome's response to antibiotics**

2 Liam P. Shaw<sup>1,2,3</sup>, Chris P. Barnes<sup>4,5</sup>, A. Sarah Walker<sup>6</sup>, Nigel Klein<sup>3</sup>, Francois Balloux<sup>1</sup>

3  
4 1: UCL Genetics Institute, UCL, London  
5 2: CoMPLEX, UCL, London  
6 3: UCL Institute of Child Health, UCL, London  
7 4: Cell and Developmental Biology, UCL, London  
8 5: Department of Genetics, Evolution and Environment (GEE), UCL, London  
9 6: MRC Clinical Trials Unit at UCL, UCL, London

## 10 **Abstract**

11 Even short courses of antibiotics are known to reduce gut microbiome diversity. However, there has been  
12 limited mathematical modelling of the associated dynamical time-response. Here, we take inspiration from a  
13 'stability landscape' schematic and develop an impulse-response model of antibiotic perturbation. We fit this  
14 model to previously published data where individuals took a ten-day course of antibiotics (clindamycin or  
15 ciprofloxacin) and were sampled up to a year afterwards. By fitting an extended model allowing for a  
16 transition to an alternative stable state, we find support for a long-term transition to an alternative community  
17 state one year after taking antibiotics. This implies that a single treatment of antibiotics not only reduces the  
18 diversity of the gut flora for up to a year but also alters its composition, possibly indefinitely. Our results  
19 provide quantitative support for a conceptual picture of the gut microbiome and demonstrate that simple  
20 models can provide biological insight.

## 21 **Introduction**

22 The human gut microbiome is a complex ecosystem and, as such, can be thought of in ecological terms. The  
23 relative stability of the gut microbiome in the absence of large perturbations has been suggested to indicate  
24 the presence of restoring forces within a dynamical system (Relman 2012). While stability appears to be the  
25 norm, disturbances to this ecosystem are also important when considering the impact of the gut microbiome  
26 on human health. One example of a major perturbation is a course of antibiotics, which typically leads to a  
27 marked reduction in species diversity before subsequent recovery (Modi *et al.* 2014). Even a brief course of  
28 antibiotics can result in long-term effects on microbial community composition, with species diversity  
29 remaining lower than its baseline value up to a year afterwards (Zaura *et al.* 2015). However, the nature of  
30 the reconstitution of the gut microbiome remains an active area of research.

31 Artificial perturbation experiments are widely used to explore the underlying dynamics of macro-ecological  
32 systems (Wootton 2010). In the context of the gut microbiome, the response after antibiotics has been  
33 extensively investigated (Sullivan *et al.* 2001; Dethlefsen *et al.* 2008; Dethlefsen & Relman 2011). However,  
34 despite interest in the application of ecological theory to the gut microbiome (Pepper & Rosenfeld 2012)  
35 there has been limited quantitative or mechanistic modelling of this response. While this may be because  
36 responses can appear individualized (Dethlefsen & Relman 2011), this does not preclude the possibility of  
37 generalized models that are applicable at the population level. Additionally, recent work suggests that  
38 alterations due to specific antibiotics are predictable and reproducible (Raymond *et al.* 2015).

39 Applying mathematical models to other ecological systems subject to perturbation has a long tradition of  
40 giving useful insight into their behaviour (Skellam 1951; May 1973; Scheffer *et al.* 2001). Crucially, it  
41 allows the comparison of different models based on different hypotheses about the subsequent behaviour of  
42 the system. Additionally, developing a consistent mathematical framework for quantifying the long-term  
43 effects of antibiotic use would facilitate comparisons between different antibiotics and different regimens,  
44 with the potential to inform approaches to antibiotic stewardship (Doron & Davidson 2011). Some previous  
45 work has attempted to model species interactions in the context of antibiotics using Lotka-Volterra models  
46 (Stein *et al.* 2013), but such models require dense temporal sampling and restriction to a small number of  
47 species to make meaningful inference, limiting their applicability to broader ecological questions.  
48 Furthermore, it has recently been shown that pairwise microbial interactions in different scenarios cannot be  
49 captured by a single equation, suggesting that pairwise modelling will often fail to predict microbial  
50 dynamics (Momeni *et al.* 2017).

51 In one popular schematic picture taken from classical ecology, the state of the gut microbiome is represented  
52 by a ball sitting in a stability landscape (Holling 1973; Lemon *et al.* 2012; Relman 2012; Lloyd-Price *et al.*  
53 2016). Perturbations can be thought of either as forces acting on the ball to displace it from its equilibrium  
54 position (Lloyd-Price *et al.* 2016), or alterations of the stability landscape (Costello *et al.* 2012). While this  
55 image is usually provided only as a conceptual model to aid thinking about the complexity of the ecosystem,  
56 we used it to derive a mathematical model to investigate whether it could provide mechanistic insight.

57 The model we outline here, based on simple ecological concepts, allows quantitative hypotheses about the  
58 effect of antibiotics on the gut microbiome to be tested. We model the effect of a brief course of antibiotics  
59 on the microbial community's phylogenetic diversity as the impulse response of an overdamped harmonic  
60 oscillator (Figure 1; see Materials and Methods), and compare parameters for two widely-used antibiotics by  
61 fitting to empirical data previously published by Zaura *et al.* (2015). We find that a variant of the model with  
62 an extra parameter accounting for the possibility of an altered equilibrium value of diversity is better  
63 supported, providing evidence from a sparse dataset that antibiotics can produce transitions to alternative  
64 stable states.

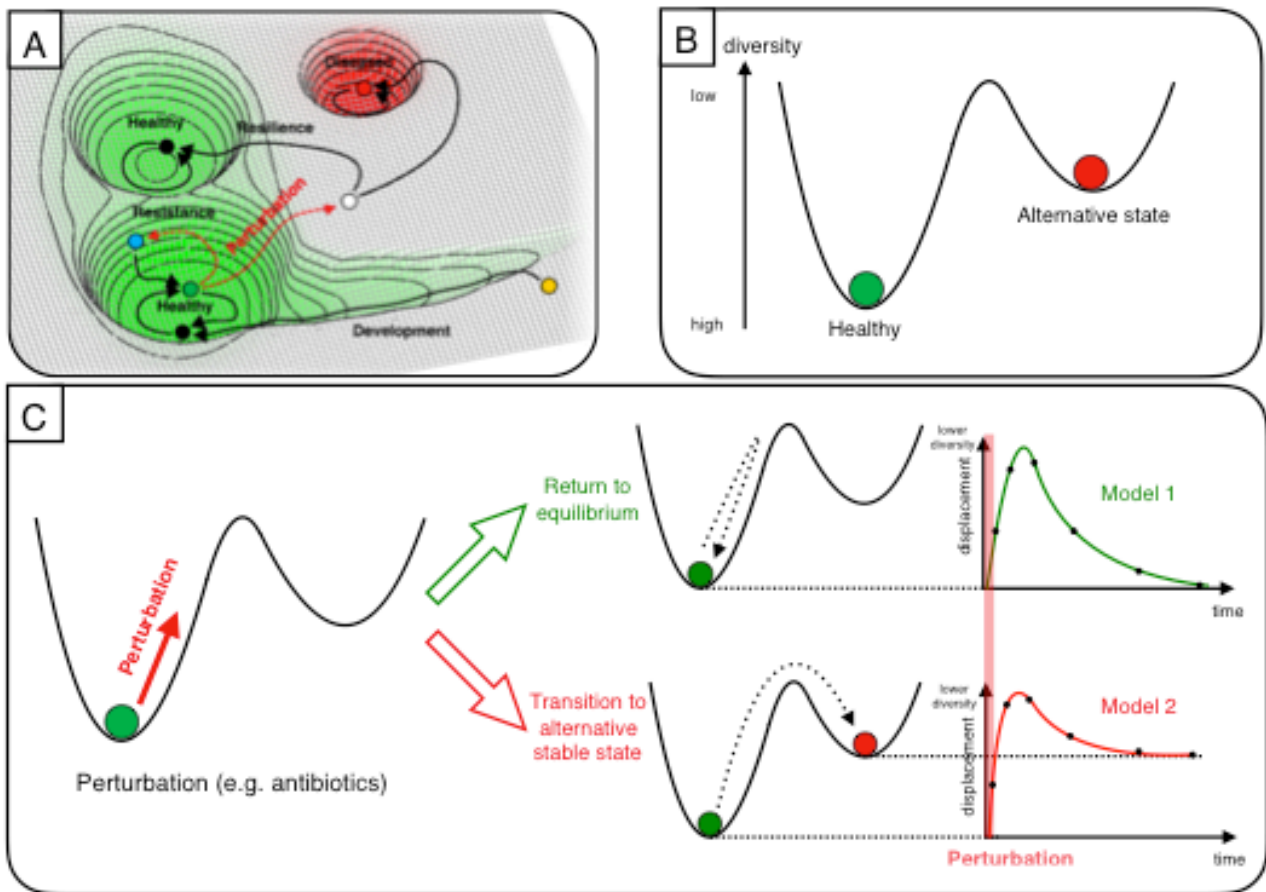

**Figure 1. An impulse response model of antibiotic perturbation to the gut microbiome.** We represent the gut microbiome as a unit mass on a stability landscape, where height corresponds to phylogenetic diversity. (A) The healthy human microbiome can be conceptualized as resting in the equilibrium of a stability landscape of all possible states of the microbiome. Perturbations can displace it from this equilibrium value into alternative states (adapted from Lloyd-Price et al. (2016)). (B) Choosing to parameterize this stability landscape using diversity, we assume that there are just two states: the healthy baseline state and an alternative stable state. (C) Perturbation to the microbiome (e.g. by antibiotics) is then modelled as an impulse, which assumes the duration of the perturbation is short relative to the overall timescale of the experiment. We consider the form of the diversity time-response under two scenarios: a return to the baseline diversity; and a transition to a different value of a diversity (i.e. an alternative stable state).

65

## 66 Results

### 67 An impulse response model for the effect of antibiotics

68 Our mechanistic model (Figure 1) assumes that a short course of antibiotics can be modelled as an impulse  
69 on the gut microbiome. With some additional simplifying assumptions about the form of the stability  
70 landscape (see Materials and Methods), we derive an analytical form for this overdamped impulse response  
71 in terms of the phylogenetic diversity of the gut microbiome (eq. 6).

72 We fit the model to published data from Zaura et al. (2015) where 30 individuals received a ten-day course  
73 of either a placebo, ciprofloxacin, or clindamycin (Table 1). Clindamycin is a lincosamide with a broad  
74 spectrum of activity against Gram-positive aerobes and anaerobes Gram-negative anaerobes (Guay 2007).  
75 Ciprofloxacin is a quinolone which targets bacterial DNA topoisomerase and DNA gyrase, making it active  
76 against a range of Gram-positive and Gram-negative bacteria (Mustaev *et al.* 2014). Faecal samples were  
77 taken at baseline (i.e. before treatment), then subsequently at ten days, one month, two months, four months,  
78 and one year after treatment.

| Group         | n   | % males | % Caucasian | Average age, years (SD) | Average weight, kg (SD) | Average height, cm (SD) |
|---------------|-----|---------|-------------|-------------------------|-------------------------|-------------------------|
| Placebo       | 10  | 50      | 100         | 26 (4)                  | 74 (9)                  | 179 (10)                |
| Ciprofloxacin | 10* | 50      | 80          | 26 (3)                  | 69 (13)                 | 176 (10)                |
| Clindamycin   | 9** | 56      | 100         | 24 (5)                  | 67 (11)                 | 175 (9)                 |

79 **Table 1. Demographic data of study participants by treatment group.** Adapted from Zaura *et al.* (2015).  
 80 \* On reanalysis after downloading data from SRA Run Selector, we found that participant KI17 was missing 2/6 faecal  
 81 samples, so they were excluded from analysis i.e. leaving  $n = 9$  for in our reanalysis of ciprofloxacin as well as  
 82 clindamycin. However, these summary statistics apply before the exclusion of KI17. \*\* One female participant who  
 83 was initially recruited dropped out of the study after enrolment.

84 The model appeared to adequately describe the initial response to antibiotics (Figure 2), where diversity  
 85 decreases (i.e. displacement from equilibrium increases) before returning gradually towards equilibrium.  
 86 Despite large variability between samples from the same treatment group, reassuringly the placebo group  
 87 clearly did not warrant an impulse response model whereas data from individuals receiving ciprofloxacin and  
 88 clindamycin was qualitatively in agreement with the model.

89 However, the residuals suggested that diversity after a year was not well-captured by the model. In their  
 90 analysis, Zaura *et al.* (2015) noted significantly ( $p < 0.05$ ) reduced Shannon diversity when comparing  
 91 samples a year after receiving 10 days' ciprofloxacin to baseline, but this could have in principle merely  
 92 been due to slow reconstitution and return to original equilibrium under the dynamics we have described.

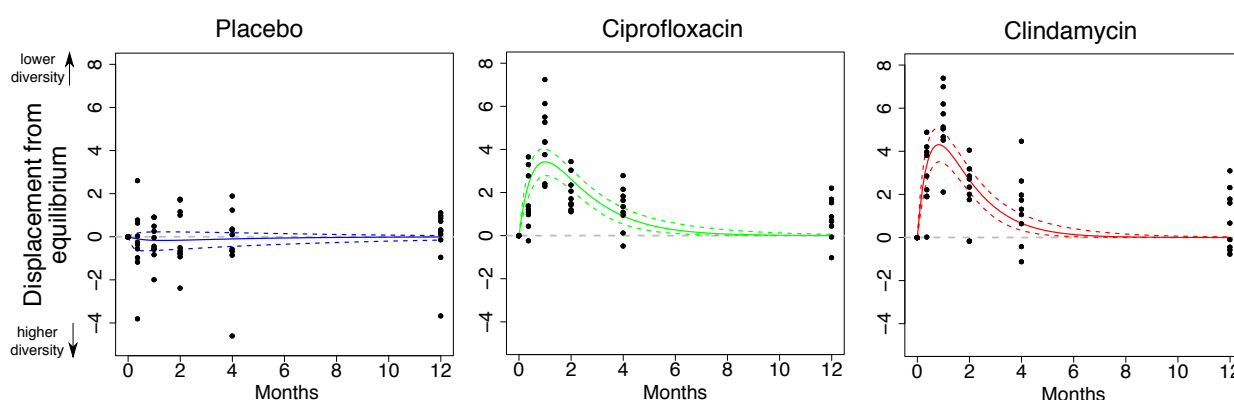

93 **Figure 2. An impulse response model captures the dynamics of the effect of antibiotics on the gut microbiome.** Bayesian fits with Stan  
 for participants taking either a placebo ( $n=10$ ), ciprofloxacin ( $n=9$ ), or clindamycin ( $n=9$ ). The mean phylogenetic diversity from 100  
 bootstraps for each sample (black points) and median and 95% credible interval from the posterior distribution (bold and dashed coloured  
 lines, respectively). The grey line indicates the equilibrium diversity value, defined on a per-individual basis relative to the mean baseline  
 diversity. The biased positive skew of residuals after a year suggests the possibility of a transition to an alternative stable state with  
 persistently reduced diversity.

94 Fitting the impulse model to the data and taking into account the whole temporal response suggests that the  
 95 lack of return to the initial equilibrium state is not due to slow reconstitution of the initial microbiome  
 96 species community. Instead, the distribution of residuals indicates that, while the initial response fits a  
 97 standard impulse response model well, the longer-term dynamics of the system did not – as might be  
 98 expected under a scenario involving a long-term transition to an alternative community state (Figure 1). We  
 99 therefore developed a variant of the model (eq. 7) to take into account potential shifts to alternative stable  
 100 states.

### 101 Support for an antibiotic-induced state transition

102 To test the hypothesis that the course of antibiotics could have moved individuals' gut microbiomes into  
 103 alternative states, we fit an extended version of our model that allowed a potential non-zero asymptotic value  
 104 (model 2; eq. 7), representing a new long-term value of diversity. We assumed a normally distributed prior  
 105 for the asymptote parameter  $A$  centred at zero (i.e. return to original equilibrium) with a variance given by  
 106 the variance of the displacement of placebo samples from baseline after a year.

107 Qualitatively, this slightly more complex model gave a similar fit (Figure 3) but with a positive displacement  
108 from equilibrium, corresponding to an alternative equilibrium state with lower diversity. We compared  
109 models with the Bayes factor  $BF$ , where  $BF > 1$  indicates support for one model over another. There was no  
110 support for model 2 over model 1 for the placebo ( $BF = 0.96$ ) but support for ciprofloxacin ( $BF = 3.36$ )  
111 and clindamycin ( $BF = 3.99$ ). The posterior estimates for the asymptote parameter for ciprofloxacin and  
112 clindamycin were substantially positively skewed (Figure 4), providing evidence of a transition to a state  
113 with lower phylogenetic diversity than the baseline.

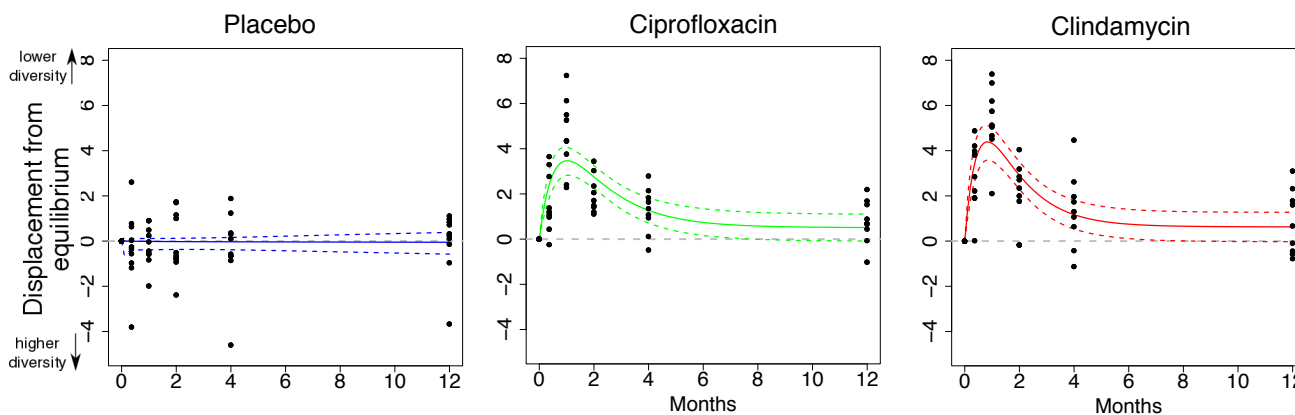

114 **Figure 3: A model with a possible state transition improves the fit to empirical data.** Bayesian fits with Stan for participants taking either a placebo (n=10), ciprofloxacin (n=9), or clindamycin (n=9). The mean phylogenetic diversity from 100 bootstraps for each sample (black points) and median and 95% credible interval from the posterior distribution (bold and dashed coloured lines, respectively). The grey line indicates the equilibrium diversity value, defined on a per-individual basis relative to the mean baseline diversity. The biased positive skew of residuals after a year suggests the possibility of a transition to an alternative stable state with persistently reduced diversity. The non-zero-centred asymptote indicates support for a state transition.

114

### 115 Comparison of parameters between antibiotics

116 Comparing the posterior distribution of parameters for model 2 fits between treatment groups (Figure 4), the  
117 strength of the perturbation parameter  $D$  was not substantially different between antibiotics. The asymptotic  
118 equilibrium parameter  $A$  was positively skewed for both antibiotics (median (95% CI):  $A_{\text{clinda}} = 0.66$  (-  
119 0.13-1.41);  $A_{\text{cipro}} = 0.58$  (-0.14-1.27), strongly suggesting persistent detrimental effects on microbiome  
120 diversity and a transition to an alternative stable state.

121 The parameters  $b$  and  $k$  were both greater in clindamycin compared to ciprofloxacin. The damping ratio  
122  $\zeta = b/(2\sqrt{k})$  summarises how perturbations decay over time, and is an inherent property of the system  
123 independent of the perturbation itself. Therefore, if our modelling framework and ecological assumptions  
124 were valid we would expect to find a consistent damping ratio across both the clindamycin and ciprofloxacin  
125 groups. This is indeed what we observed, with median (95% CI) damping ratios of  $\zeta_{\text{clinda}}=1.07$  (1.00-1.65)  
126 and  $\zeta_{\text{cipro}}=1.07$  (1.00-1.66), substantially different from both the prior and the posterior distribution in the  
127 placebo group of  $\zeta_{\text{placebo}} = 1.21$ (1.00-3.00), supporting the view of the gut microbiome as a damped  
128 harmonic oscillator.

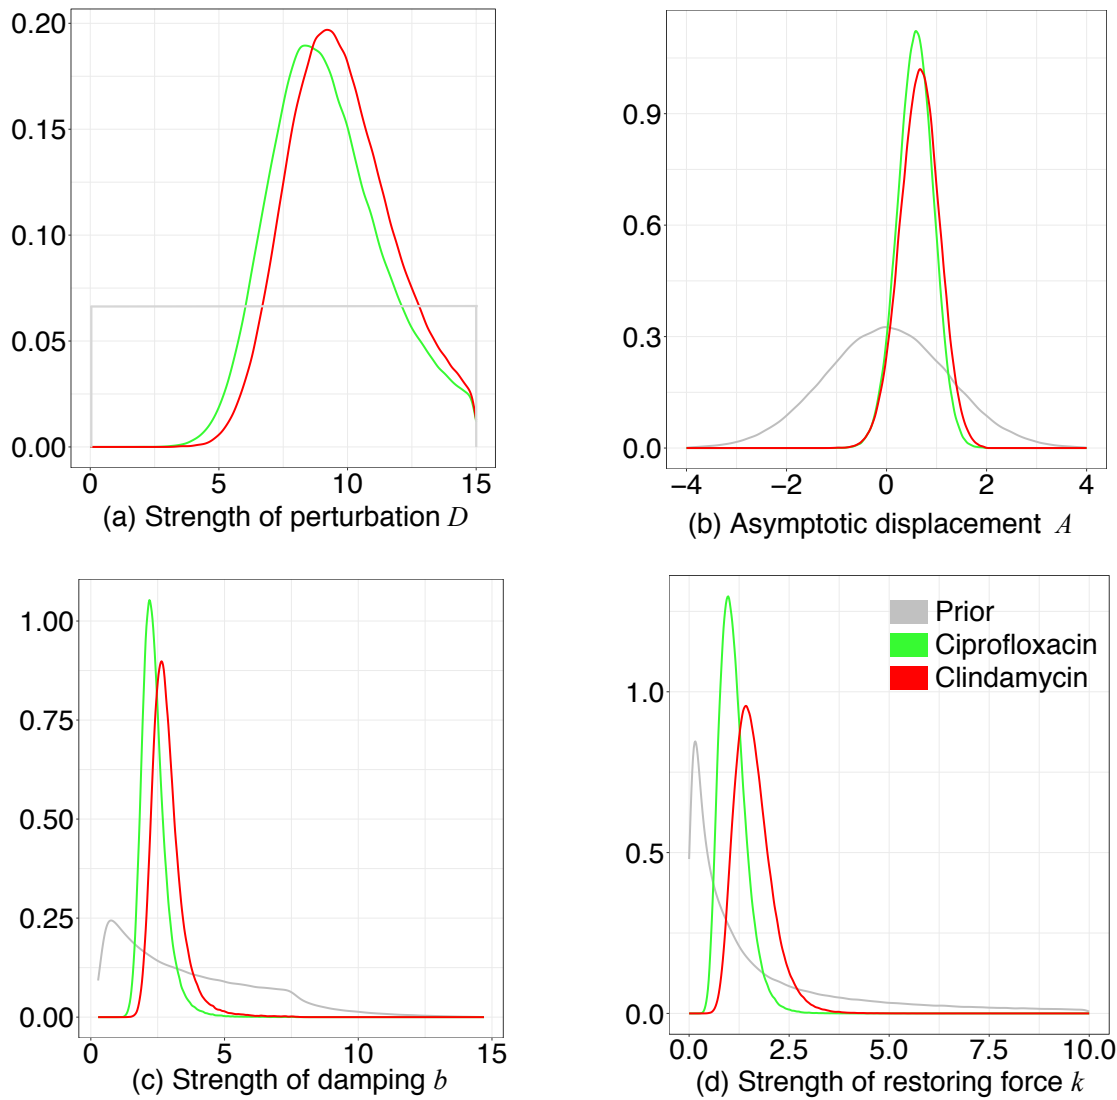

**Figure 4: Posterior parameter estimates for model with a possible transition to an alternative stable state.** The posterior distributions from Bayesian fits of model 2 (eq. 7) to empirical data for ciprofloxacin (green) and clindamycin (red). Each posterior distribution represents 400,000 iterations in total.

129  
130 **A complex, individualized antibiotic response does not prevent modelling**

131 While it is not our intention to repeat a comprehensive description of the precise nature of the response for  
132 the different antibiotics, we note some interesting qualitative observations from our reanalysis that highlight  
133 the complexity of the antibiotic response in order to make the point that, while modelling these interactions  
134 is far beyond the scope of our model, our approach is unaffected by this underlying complexity. We discuss  
135 here observations at the level of taxonomic family (Supplementary Figure 1).

136 Despite their different mechanisms of action, both clindamycin and ciprofloxacin caused a dramatic decrease  
137 in the Gram-negative anaerobes *Rikenellaceae*, which was most marked a month after the end of the course.  
138 However, for ciprofloxacin this decrease had already started immediately after treatment, whereas for  
139 clindamycin the abundance after treatment was unchanged in most participants. The different temporal  
140 nature of this response perhaps reflects the bacteriocidal nature of ciprofloxacin (Mustaev *et al.* 2014)  
141 compared to the bacteriostatic effect of clindamycin, although concentrations *in vivo* can produce  
142 bacteriocidal effects (Spížek & Řezanka 2004).

143 There were clear differences in response between antibiotics. For example, clindamycin caused a decrease in  
144 the anaerobic Gram-positives *Ruminococcaceae* after a month, whereas ciprofloxacin had no effect.

145 Conversely ciprofloxacin caused lower levels of *Barnesiellaceae* which was largely unaffected by  
146 clindamycin.

147 Some families appeared unaffected by antibiotics: the *Bacteroidaceae* were largely unaffected in most  
148 individuals. Furthermore, while overall diversity decreased, this can still be consistent with increases in the  
149 relative abundance of certain taxa. For example, ciprofloxacin led to increases in *Erysipelotrichaceae*, which  
150 were dramatic in some individuals. Interestingly, for these individuals these increases coincided with marked  
151 decreases in *Bacteroidaceae*, suggesting the relevance of inter-family microbial interactions (Supplementary  
152 Figure 1). The individualized nature of the ciprofloxacin response was also noticeable in *Lachnospiraceae* –  
153 which was largely unaffected by clindamycin – as its abundance dropped below detectable levels in some  
154 individuals after a month but remained unchanged in other individuals.

155 Comparing relative abundances at the family level, there were few differences between community states of  
156 different treatment groups after a year. Equal phylogenetic diversity can be produced by different community  
157 composition, and this suggests against consistent trends in the long-term dysbiosis associated with each  
158 antibiotic. However, we did find that *Peptostreptococcaceae*, a member of the order *Clostridiales*, was  
159 significantly more abundant in the clindamycin group when compared to both the ciprofloxacin group and  
160 the placebo group separately ( $p < 0.05$ , Wilcoxon rank sum test). In a clinical setting, clindamycin is well-  
161 established to lead to an increased risk of a life-threatening infection caused by another member of  
162 *Clostridiales*: *Clostridium difficile* (Thomas *et al.* 2003). The long-term reduction in diversity may well  
163 similarly increase the risk of colonization and overgrowth of pathogenic species.

## 164 Discussion

165 Starting from a common qualitative conceptual picture of the gut microbiome as resting within a stability  
166 landscape, we have developed a simple mathematical model of its response to perturbation. With a few  
167 simplifying ecological assumptions, most notably that the phylogenetic diversity of the gut microbiome  
168 relative to its baseline value in some way parameterises this stability landscape, we have demonstrated that  
169 the response of the gut microbiome to a short course of antibiotics can be modelled as an impulse acting on a  
170 damped harmonic oscillator. Crucially, the simplifications involved appear to be justified at some  
171 fundamental level, as this model proves to successfully capture dynamics of empirical data. From this, we  
172 suggest that the restoring forces that contribute to the gut microbiome's resilience to perturbation are  
173 proportional to displacement from equilibrium and that the system is overdamped.

174 Our approach uses a simple conceptual model to give mechanistic insight. Zaura *et al.* (2015) made the  
175 observation from their dataset that the lowest diversity was observed after a month rather than immediately  
176 after treatment stopped. This cannot be due to a persistence of the antibiotic effect, as clindamycin and  
177 ciprofloxacin only have short half-lives of the order of hours (Leigh 1981; Bergan *et al.* 1987). Our model  
178 gives us a mechanistic framework for thinking about this temporal delay: the full effects of the transient  
179 impulse take time to be realized due to the overdamped nature of the system, and we found a consistent  
180 damping ratio for both antibiotics analyzed.

181 We have also demonstrated how this modelling framework could be used to compare different hypotheses  
182 about the long-term effect of antibiotic perturbation on the gut microbiome by fitting different models and  
183 using Bayesian model selection. Our modelling work provides an additional line of evidence that while  
184 short-term restoration obeys a simple impulse response model, the underlying long-term community state  
185 can be fundamentally altered by a brief course of antibiotics, as suggested previously by others (Dethlefsen  
186 & Relman 2011), raising concerns about the long-term impact of antibiotic use on the gut microbiome.  
187 Despite the noisiness of the dataset and reliance on uninformative priors, we still found evidence that a  
188 model with a state transition was better supported, which was not observed in individuals taking a placebo.  
189 The transition to a new state with reduced diversity may increase the risk of colonization and overgrowth of  
190 pathogenic species. Even if only marginal, when considered at a population level this may mean that

191 antibiotics have substantial negative health consequences that could support reductions in the length of  
192 antibiotic courses, in addition to concerns about antibiotic resistance (Llewelyn *et al.* 2017). Modelling the  
193 long-term impact on the microbiome of different doses and courses could help to influence the use of  
194 antibiotics in routine clinical care.

195 While the evidence for a long-term state transition is weak at present, we can at the very least conclude that  
196 the restoration of diversity after a year does not seem to obey the same underlying dynamics that govern the  
197 initial response, even if we remain agnostic about the most appropriate model refinement. This disparity  
198 between the short- and long-term time-evolution of the system is relevant to the distinction between different  
199 definitions of resilience. Implicit in some definitions of ecological resilience is the assumption that the  
200 fundamental shape of the stability landscape remains unaltered (Gunderson 2000), which we also adopt here,  
201 but it is possible that this assumption is invalid and should also be explicitly modelled.

202 Our sample size is small so the precise posterior estimates for parameters that we obtain should not be over-  
203 interpreted, but comparing antibiotics using these estimates represents another practical application of such  
204 simple models. However, these posterior estimates for the model parameters were fairly wide, which is to be  
205 expected with a sparse and small dataset. Hierarchical mixed effects models may offer an improved fit,  
206 particularly if they take into account other covariates; however, here we lacked metadata on the participants  
207 from the original study (Table 1).

208 A single metric clearly fails to capture all the complexity of the microbial community and its interactions.  
209 Nevertheless, the observation that treating phylogenetic diversity as the ‘height’ in the stability landscape  
210 leads to a reasonable fit of a simple model is interesting, as it supports observations of functional redundancy  
211 in the gut microbiome (Turnbaugh *et al.* 2007). An interesting extension of this work would be to  
212 systematically fit the model to a variety of diversity metrics and assess the model fit to see which metric, or  
213 combination of metrics, is most appropriately interpreted as the state variable parameterizing the stability  
214 landscape. A possible complementary approach could consider the diversity of the gut resistome (van Schaik  
215 2015).

216 We would not expect the behavior with longer or repeated courses of antibiotics to be well-described by an  
217 impulse response model, but it would be possible to use the mathematical framework given here to obtain an  
218 analytic form for the possible system response by convolving any given perturbation function with the  
219 impulse response. It remains to be seen whether this simple model would break down in such circumstances.

220 The detailed nature of the gut microbiome’s response to clindamycin and ciprofloxacin was individualized in  
221 our dataset, as others have also observed with shotgun sequencing of samples from healthy participants given  
222 a second-generation cephalosporin (Raymond *et al.* 2016). We believe it would be a mistake to react to this  
223 complexity by assuming that no simplified model can capture general details of the ecosystem. At this stage  
224 of our understanding, creating a comprehensive inter-species model of the hundreds of members of the gut  
225 microbiome appears intractable. We recommend that microbiome research instead starts with ecologically-  
226 informed simple models and believe there is a place for both ‘bottom-up’ models using pairwise interactions  
227 for systems of reduced complexity like bioreactors, and ‘top-down’ models using general ecological  
228 principles, as we have attempted to demonstrate here.

229 We have shown that comparing different hypotheses about the response of the gut microbiome to antibiotics  
230 is possible by using a simple model derived from minimal assumptions about the nature of its equilibrium  
231 diversity. Future mathematical models of the gut microbiome, in conjunction with carefully designed  
232 longitudinal studies, will offer many more opportunities to rigorously test ecological hypotheses.



## 233 **Materials and methods**

### 234 **Ecological assumptions**

235 We represent the state of the gut microbiome as a unit mass resting in a stability landscape (Figure 1A).  
236 Choosing to mathematically model the state of the gut microbiome in this way also requires choosing a  
237 mathematical representation with reference to an equilibrium value. While earlier studies sought to identify a  
238 core set of ‘healthy’ microbes, the disturbance of which would indicate displacement from equilibrium, it has  
239 become apparent that this is not a practical definition due to high inter-individual variability in taxonomic  
240 composition (Lloyd-Price *et al.* 2016). More recent concepts of a healthy ‘functional core’ appear more  
241 promising, but characterization is challenging, particularly as many gut microbiome studies use 16S rRNA  
242 marker gene sequencing rather than whole-genome shotgun sequencing.

243 Therefore, we choose to use a metric that offers a proxy for the general functional potential of the gut  
244 microbiome: phylogenetic diversity (Lloyd-Price *et al.* 2016). Higher diversity has previously been  
245 associated with health (Turnbaugh *et al.* 2007) and temporal stability (Flores *et al.* 2014). For these reasons,  
246 we assume the equilibrium position to have higher diversity than the points immediately surrounding it,  
247 forming a potential well (Figure 1B). However, there may be alternative stable states that represent possible  
248 ‘dysbiotic’ states (Figure 1B), which are of interest when considering the effect of perturbations (Figure 1C).

### 249 **The model**

250 We treat the local stability landscape as a harmonic potential, with a ‘restoring’ force proportional to the  
251 displacement  $x$  from the equilibrium position ( $-kx$ ). We also assume the presence of a ‘frictional’ force  
252 acting against the direction of motion ( $-b\dot{x}$ ). This system is equivalent to a damped harmonic oscillator  
253 (Riley *et al.* 1997) with the following equation of motion:

$$254 \quad (1) \quad \frac{d^2x}{dt^2} + b \frac{dx}{dt} + kx = 0$$

255 Additional forces acting on the system now appear on the right-hand side of this equation as perturbations.  
256 Consider a course of antibiotics of duration  $\tau$ . If we are interested in the behaviour of the system at  
257 timescales  $T \gg \tau$ , we can assume for simplicity that this perturbation is of infinitesimal duration and model  
258 it as an impulse of magnitude  $D$  acting at time  $t = 0$ :

$$259 \quad (2) \quad \frac{d^2x}{dt^2} + b \frac{dx}{dt} + kx = D\delta(t)$$

260 To solve this second order differential equation, we assume that  $b^2 > 4k$  (the ‘overdamped’ case) based on  
261 the lack of any oscillatory behaviour previously observed in the gut microbiome, to the best of our  
262 knowledge. Then, subject to the initial conditions  $x(0^+) = 0$  and  $\dot{x}(0^+) = D$  we obtain the following  
263 equation describing the system’s trajectory:

$$264 \quad (3) \quad x(t) = \frac{D}{2\sqrt{\left(\frac{b}{2}\right)^2 - k}} \left( e^{-\left(\frac{b}{2} - \sqrt{\left(\frac{b}{2}\right)^2 - k}\right)t} - e^{-\left(\frac{b}{2} + \sqrt{\left(\frac{b}{2}\right)^2 - k}\right)t} \right)$$

265 Fitting the model therefore requires fitting three parameters:  $b$  (the damping on the system),  $k$  (the strength  
266 of the restoring force), and  $D$  (how strong the perturbation is). For the purposes of fitting the model, we  
267 choose to reparameterise the model using the following definitions:

$$268 \quad (4) \quad b = e^{\phi_1} + e^{\phi_2}$$

$$269 \quad (5) \quad k = e^{\phi_1 + \phi_2}$$

270 Resulting in the following model (Model 1, Figure 1C):

271 (6) 
$$x_1(t) = \frac{De^{\phi_1}e^{\phi_2}}{e^{\phi_2}-e^{\phi_1}} \cdot (e^{-e^{\phi_1}t} - e^{-e^{\phi_2}t})$$

272 Antibiotics may lead not just to displacement from equilibrium, but also state transitions to new equilibria  
273 (Modi *et al.* 2014). To investigate this possibility, we also consider a model where the value of equilibrium  
274 diversity asymptotically tends to a new value  $A$  (Model 2, Figure 1C).

275 (7) 
$$x_2(t) = \frac{De^{\phi_1}e^{\phi_2}}{e^{\phi_2}-e^{\phi_1}} \cdot (e^{-e^{\phi_1}t} - e^{-e^{\phi_2}t}) + A \cdot (1 - e^{-e^{\phi_1}t})$$

## 276 Empirical dataset

277 To validate our model and test whether antibiotic perturbation caused a state transition we fitted both models  
278 to an empirical dataset and compared the results. Zaura *et al.* (2015) conducted a study on the long-term  
279 effect of antibiotics on the gut microbiome which provides an ideal test dataset. As part of this study, 30  
280 Swedish individuals (15 males and 15 females, average age 26 years, range 18-45 years) were randomly  
281 assigned to either ciprofloxacin, clindamycin, or a placebo. The antibiotics (150 mg clindamycin four times a  
282 day, 500 mg ciprofloxacin twice a day) and placebo were administered for  $\tau = 10$  days and longitudinal  
283 faecal samples collected until  $T = 1$  year afterwards (i.e.  $\frac{\tau}{T} \sim 0.027 \ll 1$ ) at baseline, after treatment, one  
284 month, two months, four months, and one year. Samples underwent 16S rRNA gene amplicon sequencing,  
285 targeting the V5-V7 region (SRA: SRP057504). We reanalysed this data, doing de novo clustering into  
286 operational taxonomic units (OTUs) at 97% similarity with VSEARCH v1.1.1 (Rognes *et al.* 2016) with  
287 chimeras removed against the 16S gold database (<http://drive5.com/uchime/gold.fa>). Taxonomy was  
288 assigned with RDP (Wang *et al.* 2007).

## 289 Phylogenetic diversity

290 There are many possible diversity metrics that could be used to compute the displacement from equilibrium.  
291 Because of our assumption that phylogenetic diversity approximates functional potential, which is itself a  
292 proxy for ecosystem ‘health’ (see ‘Ecological assumptions’), we chose to use Faith’s phylogenetic diversity  
293 (Faith 1992) calculated with the `pd()` function in the ‘picante’ R package v1.6-2 (Kembel *et al.* 2010).  
294 Calculating Faith’s phylogenetic diversity requires a phylogeny, which we produced with RaxML v8.1.15  
295 (Stamatakis 2014) after aligning 16S rRNA V5-V7 OTU sequences with Clustal Omega v1.2.1 (Sievers *et al.*  
296 *et al.* 2011). To obtain values for fitting the model, we used mean bootstrapped values ( $n = 100$ , sampling  
297 depth  $r = 2000$ ) of phylogenetic diversity  $d_i$  relative to the baseline phylogenetic diversity  $d_0$  for each  
298 individual, representing the displacement from equilibrium in our model:

299 (8) 
$$\bar{d}_i = d_i - d_0$$

## 300 Model fitting

301 We used a Bayesian framework to fit models 1 and 2 (eq. 6 and 7) using Stan (Carpenter *et al.* 2017) and  
302 RStan (Stan Development Team 2017) to the three separate groups: placebo, ciprofloxacin, and clindamycin.  
303 In brief, our approach used 4 chains with a burn-in period of 10,000 iterations and 100,000 subsequent  
304 iterations, verifying that all chains converged ( $\hat{R} = 1$ ) and the effective sample size for each parameter was  
305 sufficiently large ( $n_{eff} > 10,000$ ).

306 We used uninformative priors for the three parameters in the original model 1 without a state transition (eq.  
307 6). For ciprofloxacin and clindamycin we used the same uniformly distributed prior for  $D$ , and uniform  
308 priors for  $\phi_1, \phi_2$ . For model 2 with a state transition (eq. 7) we used the same priors, with a normal prior  
309 centred at zero for the new equilibrium value  $A$  with a standard deviation given by the standard deviation of  
310 the displacement of placebo samples from baseline after a year, with bounds between -2 and 2. The priors  
311 are as follows:

312 (9.1) 
$$D \sim \text{uniform}(0, 15)$$

313 **(9.2)**  $\phi_1 \sim \text{uniform}(-1.99, 1.99)$

314 **(9.3)**  $\phi_2 \sim \text{uniform}(-2, 2)$

315 **(9.4)**  $A \sim \text{normal}(0, 1.263)$

316 For the placebo group, we expected no perturbation response so used a uniform prior for  $D$  centred at zero:

317 **(10)**  $D \sim \text{uniform}(-5, 5)$

318 We compared models 1 and 2 for each treatment group using the Bayes factor (Aitkin 1991; Kass & Raftery  
319 1995) after extracting the model fits using bridge sampling with the bridgesampling R package v0.2-2  
320 (Gronau *et al.* 2017). A prior sensitivity analysis showed that choice of priors did not affect the conclusion  
321 that model 2 outperformed model 1 for the two antibiotics, although the strength of the Bayes factor varied.

322 Full code for fitting the models to empirical data is available as a zipped archive (Supplemental Code 1).

## 323 **Acknowledgements**

### 324 **Author contributions**

325 LPS conceived the model, performed analyses, and wrote the paper. All authors contributed to discussion of  
326 the model and gave comments on the paper.

### 327 **Data accessibility statement**

328 Datasets and code necessary to reproduce the results and figures are available as Supporting Information. All  
329 sequence data reported in this paper has been previously deposited in the NCBI Sequence Read Archive as  
330 part of another publication (SRA accession SRP057504).

### 331 **Funding**

332 LPS is supported by the Engineering and Physical Sciences Research Council [EP/F500351/1] and the  
333 Reuben Centre for Paediatric Virology and Metagenomics. CPB is supported by the Wellcome Trust  
334 [097319/Z/11/Z].

## 335 **References**

- 336  
337 1. Aitkin, M. (1991). Posterior Bayes Factors. *J. R. Stat. Soc. Ser. B*
- 338  
339 2. Bergan, T., Thorsteinsson, S.B., Solberg, R., Bjornskau, L., Kolstad, I.M. & Johnsen, S. (1987).  
340 Pharmacokinetics of ciprofloxacin: intravenous and increasing oral doses. *Am. J. Med.*, 82, 97–102
- 341  
342 3. Carpenter, B., Gelman, A., Hoffman, M.D., Lee, D., Goodrich, B., Betancourt, M., et al. (2017). Stan : A  
343 Probabilistic Programming Language. *J. Stat. Softw.*, 76, 1–32
- 344  
345 4. Costello, E.K., Stagaman, K., Dethlefsen, L., Bohannan, B.J.M. & Relman, D.A. (2012). The application  
346 of ecological theory toward an understanding of the human microbiome. *Science*, 336, 1255–62
- 347  
348 5. Dethlefsen, L., Huse, S., Sogin, M.L. & Relman, D.A. (2008). The Pervasive Effects of an Antibiotic on  
349 the Human Gut Microbiota, as Revealed by Deep 16S rRNA Sequencing. *PLoS Biol.*, 6, e280
- 350  
351 6. Dethlefsen, L. & Relman, D.A. (2011). Incomplete recovery and individualized responses of the human  
352 distal gut microbiota to repeated antibiotic perturbation. *Proc. Natl. Acad. Sci. U. S. A.*, 4554–61
- 353  
354 7. Doron, S. & Davidson, L.E. (2011). Antimicrobial stewardship. *Mayo Clin. Proc.*, 86, 1113–23
- 355  
356 8. Faith, D.P. (1992). Conservation evaluation and phylogenetic diversity. *Biol. Conserv.*, 61, 1–10
- 357  
358 9. Flores, G.E., Caporaso, J.G., Henley, J.B., Rideout, J.R., Domogala, D., Chase, J., et al. (2014). Temporal  
359 variability is a personalized feature of the human microbiome. *Genome Biol.*, 15, 531
- 360  
361 10. Gronau, Q.F., Singmann, H. & Wagenmakers, E.-J. (2017). bridgesampling: An R Package for Estimating  
362 Normalizing Constants
- 363  
364 11. Guay, D. (2007). Update on clindamycin in the management of bacterial, fungal and protozoal infections.  
365 *Expert Opin. Pharmacother.*, 8, 2401–2444
- 366  
367 12. Gunderson, L.H. (2000). Ecological Resilience—In Theory and Application. *Annu. Rev. Ecol. Syst.*, 31,  
368 425–439
- 369  
370 13. Holling, C.S. (1973). Resilience and Stability of Ecological Systems. *Annu. Rev. Ecol. Syst.*, 4, 1–23
- 371  
372 14. Kass, R.E. & Raftery, A.E. (1995). Bayes Factors. *J. Am. Stat. Assoc.*, 90, 773–795
- 373  
374 15. Kembel, S.W., Cowan, P.D., Helmus, M.R., Cornwell, W.K., Morlon, H., Ackerly, D.D., et al. (2010).  
375 Picante: R tools for integrating phylogenies and ecology. *Bioinformatics*, 26, 1463–1464
- 376  
377 16. Leigh, D.A. (1981). Antibacterial activity and pharmacokinetics of clindamycin. *J. Antimicrob.*  
378 *Chemother.*, 7, 3–9
- 379  
380 17. Lemon, K.P., Armitage, G.C., Relman, D.A. & Fischbach, M.A. (2012). Microbiota-Targeted Therapies:  
381 An Ecological Perspective. *Sci. Transl. Med.*, 4, 137rv5–137rv5
- 382

- 383 18.Llewelyn, M.J., Fitzpatrick, J.M., Darwin, E., SarahTonkin-Crine, Gorton, C., Paul, J., *et al.* (2017). The  
384 antibiotic course has had its day. *BMJ*, 358, j3418
- 385
- 386 19.Lloyd-Price, J., Abu-Ali, G. & Huttenhower, C. (2016). The healthy human microbiome. *Genome Med.*,  
387 8, 51
- 388
- 389 20.May, R.M. (Robert M. (1973). *Stability and complexity in model ecosystems*. Princeton University Press
- 390
- 391 21.Modi, S.R., Collins, J.J., Relman, D.A., D'Costa, V., Bhullar, K., Costello, E., *et al.* (2014). Antibiotics  
392 and the gut microbiota. *J. Clin. Invest.*, 124, 4212–4218
- 393
- 394 22.Momeni, B., Xie, L. & Shou, W. (2017). Lotka-Volterra pairwise modeling fails to capture diverse  
395 pairwise microbial interactions. *Elife*, 6, e25051
- 396
- 397 23.Mustaev, A., Malik, M., Zhao, X., Kurepina, N., Luan, G., Oppegard, L.M., *et al.* (2014).  
398 Fluoroquinolone-Gyrase-DNA Complexes. *J. Biol. Chem.*, 289, 12300–12312
- 399
- 400 24.Pepper, J.W. & Rosenfeld, S. (2012). The emerging medical ecology of the human gut microbiome.  
401 *Trends Ecol. Evol.*, 27, 381–384
- 402
- 403 25.Raymond, F., Ouameur, A.A., Déraspe, M., Iqbal, N., Gingras, H., Dridi, B., *et al.* (2015). The initial  
404 state of the human gut microbiome determines its reshaping by antibiotics. *ISME J.*
- 405
- 406 26.Raymond, F., Ouameur, A.A., Déraspe, M., Iqbal, N., Gingras, H., Dridi, B., *et al.* (2016). The initial  
407 state of the human gut microbiome determines its reshaping by antibiotics. *ISME J.*, 10, 707–720
- 408
- 409 27.Relman, D.A. (2012). The human microbiome: ecosystem resilience and health. *Nutr. Rev.*, 70 Suppl 1,  
410 S2-9
- 411
- 412 28.Riley, K.F. (Kenneth F., Hobson, M.P. (Michael P. & Bence, S.J. (Stephen J. (1997). *Mathematical*  
413 *methods for physics and engineering : a comprehensive guide*. Cambridge University Press
- 414
- 415 29.Rognes, T., Flouri, T., Nichols, B., Quince, C. & Mahé, F. (2016). VSEARCH: a versatile open source  
416 tool for metagenomics. *PeerJ*, 4, e2584
- 417
- 418 30.van Schaik, W. (2015). The human gut resistome. *Philos. Trans. R. Soc. B Biol. Sci.*, 370, 20140087–  
419 20140087
- 420
- 421 31.Scheffer, M., Carpenter, S., Foley, J.A., Folke, C. & Walker, B. (2001). Catastrophic shifts in ecosystems.  
422 *Nature*, 413, 591–596
- 423
- 424 32.Sievers, F., Wilm, A., Dineen, D., Gibson, T.J., Karplus, K., Li, W., *et al.* (2011). Fast, scalable  
425 generation of high-quality protein multiple sequence alignments using Clustal Omega. *Mol. Syst. Biol.*, 7,  
426 539
- 427
- 428 33.Skellam, J.G. (1951). Random dispersal in theoretical populations. *Biometrika*, 38, 196–218
- 429
- 430 34.Spížek, J. & Řezanka, T. (2004). Lincomycin, clindamycin and their applications. *Appl. Microbiol.*  
431 *Biotechnol.*, 64, 455–464

- 432  
433 35.Stamatakis, A. (2014). RAxML version 8: a tool for phylogenetic analysis and post-analysis of large  
434 phylogenies. *Bioinformatics*, 30, 1312–1313
- 435  
436 36.Stan Development Team. (2017). RStan: the R interface to Stan. R package version 2.16.2
- 437  
438 37.Stein, R.R., Bucci, V., Toussaint, N.C., Buffie, C.G., Räscher, G., Pamer, E.G., *et al.* (2013). Ecological  
439 modeling from time-series inference: insight into dynamics and stability of intestinal microbiota. *PLoS*  
440 *Comput. Biol.*, 9, e1003388
- 441  
442 38.Sullivan, Å., Edlund, C. & Nord, C.E. (2001). Effect of antimicrobial agents on the ecological balance of  
443 human microflora. *Lancet Infect. Dis.*, 1, 101–114
- 444  
445 39.Thomas, C., Stevenson, M. & Riley, T. V. (2003). Antibiotics and hospital-acquired *Clostridium difficile*-  
446 associated diarrhoea: a systematic review. *J. Antimicrob. Chemother.*, 51, 1339–1350
- 447  
448 40.Turnbaugh, P.J., Ley, R.E., Hamady, M., Fraser-Liggett, C.M., Knight, R. & Gordon, J.I. (2007). The  
449 Human Microbiome Project. *Nature*, 449, 804–810
- 450  
451 41.Wang, Q., Garrity, G.M., Tiedje, J.M. & Cole, J.R. (2007). Naive Bayesian classifier for rapid assignment  
452 of rRNA sequences into the new bacterial taxonomy. *Appl. Environ. Microbiol.*, 73, 5261–7
- 453  
454 42.Wootton, J.T. (2010). Experimental species removal alters ecological dynamics in a natural ecosystem.  
455 *Ecology*, 91, 42–8
- 456  
457 43.Zaura, E., Brandt, B.W., Teixeira de Mattos, M.J., Buijs, M.J., Caspers, M.P.M., Rashid, M.-U., *et al.*  
458 (2015). Same Exposure but Two Radically Different Responses to Antibiotics: Resilience of the Salivary  
459 Microbiome versus Long-Term Microbial Shifts in Feces. *MBio*, 6, e01693-15-e01693-15
- 460

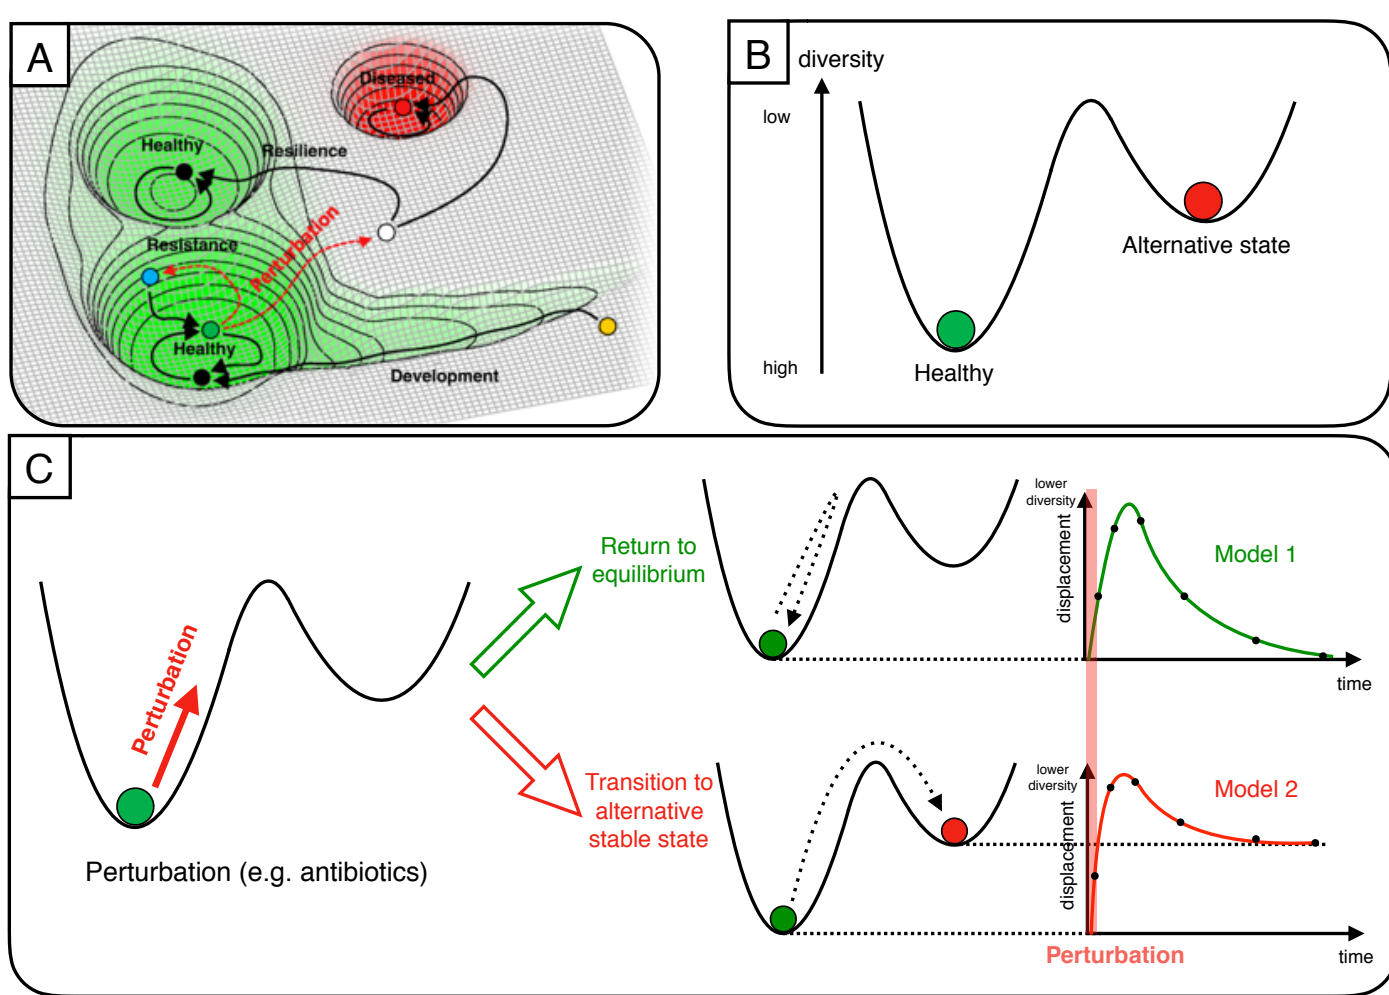

**Figure 1. An impulse response model of antibiotic perturbation to the gut microbiome.** We represent the gut microbiome as a unit mass on a stability landscape, where height corresponds to phylogenetic diversity. (A) The healthy human microbiome can be conceptualized as resting in the equilibrium of a stability landscape of all possible states of the microbiome. Perturbations can displace it from this equilibrium value into alternative states (adapted from Lloyd-Price et al. (2016)). (B) Choosing to parameterize this stability landscape using diversity, we assume that there are just two states: the healthy baseline state and an alternative stable state. (C) Perturbation to the microbiome (e.g. by antibiotics) is then modelled as an impulse, which assumes the duration of the perturbation is short relative to the overall timescale of the experiment. We consider the form of the diversity time-response under two scenarios: a return to the baseline diversity; and a transition to a different value of a diversity (i.e. an alternative stable state).

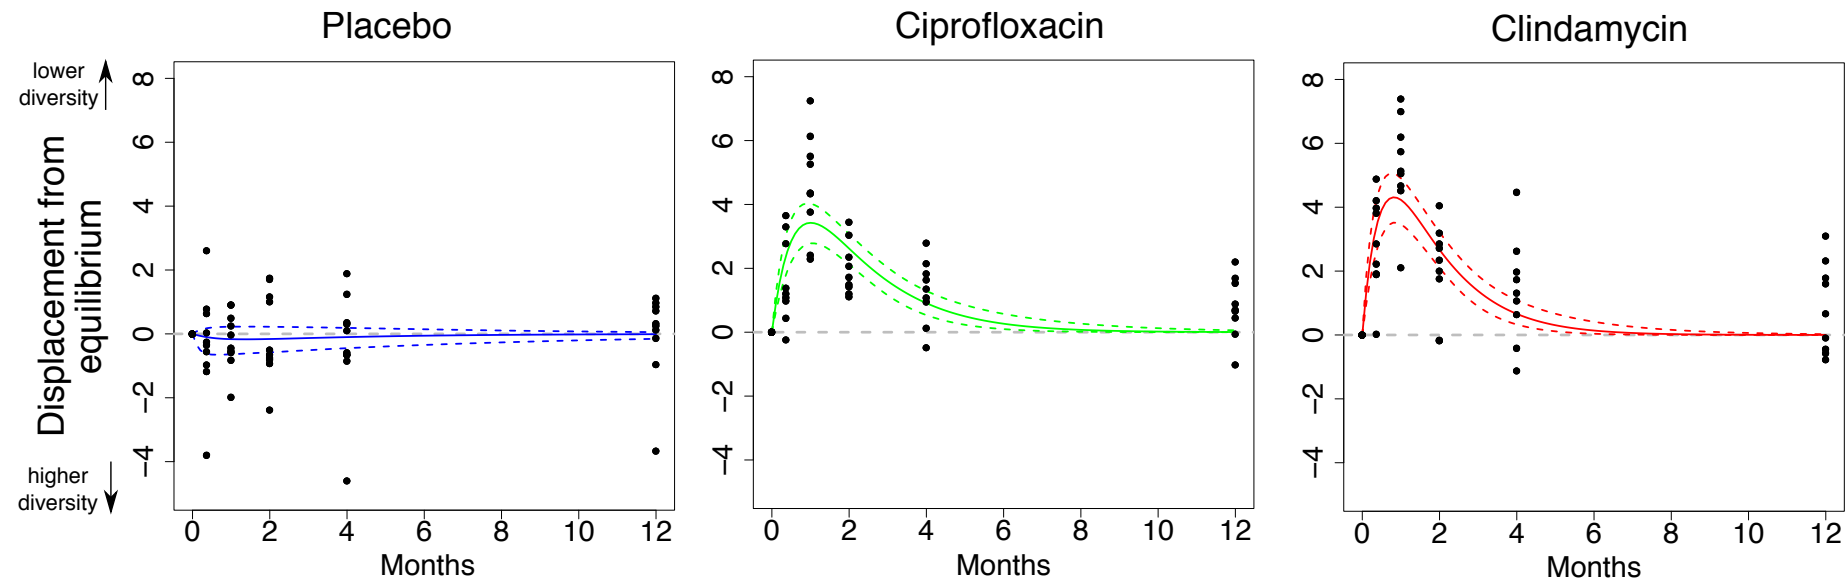

**Figure 2. An impulse response model captures the dynamics of the effect of antibiotics on the gut microbiome.** Bayesian fits with Stan for participants taking either a placebo (n=10), ciprofloxacin (n=9), or clindamycin (n=9). The mean phylogenetic diversity from 100 bootstraps for each sample (black points) and median and 95% credible interval from the posterior distribution (bold and dashed coloured lines, respectively). The grey line indicates the equilibrium diversity value, defined on a per-individual basis relative to the mean baseline diversity. The biased positive skew of residuals after a year suggests the possibility of a transition to an alternative stable state with persistently reduced diversity.



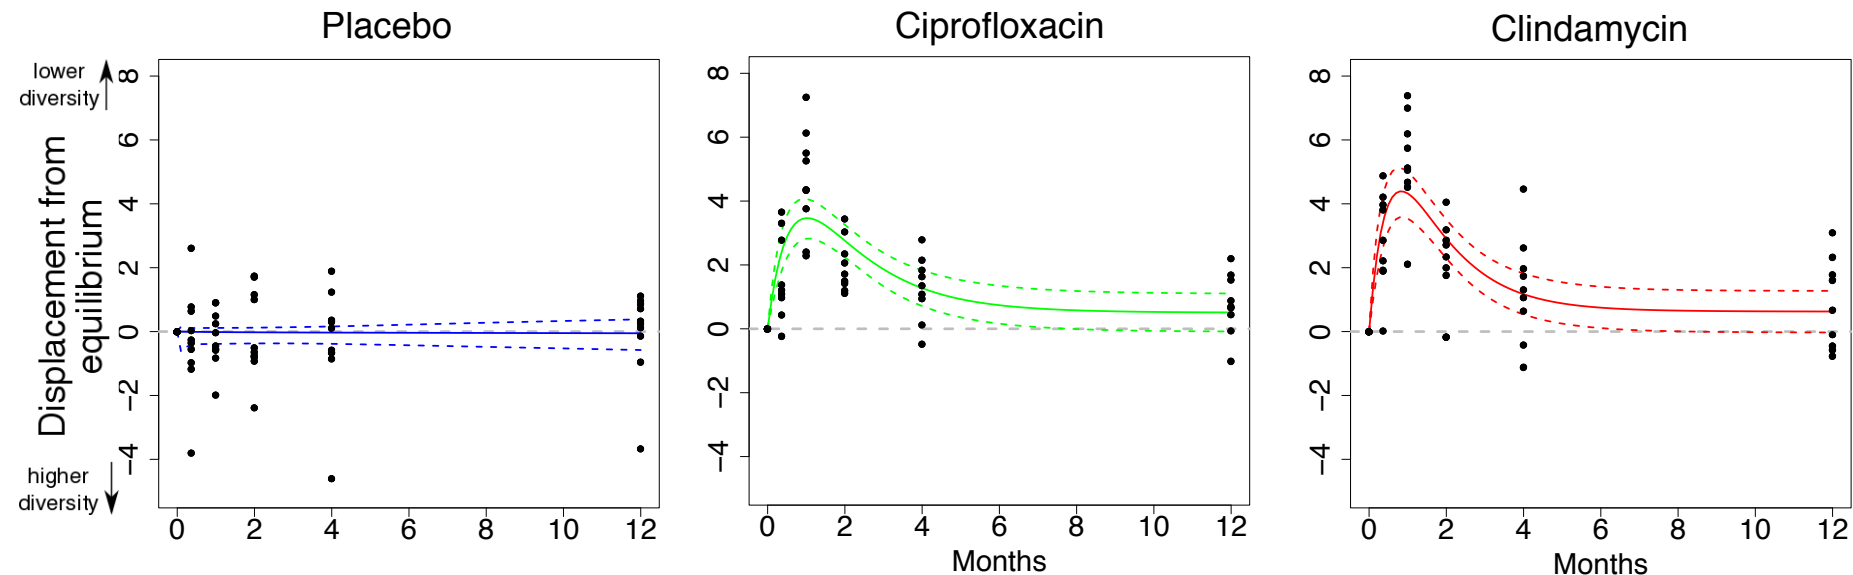

**Figure 3: A model with a possible state transition improves the fit to empirical data.** Bayesian fits with Stan for participants taking either a placebo (n=10), ciprofloxacin (n=9), or clindamycin (n=9). The mean phylogenetic diversity from 100 bootstraps for each sample (black points) and median and 95% credible interval from the posterior distribution (bold and dashed coloured lines, respectively). The grey line indicates the equilibrium diversity value, defined on a per-individual basis relative to the mean baseline diversity. The biased positive skew of residuals after a year suggests the possibility of a transition to an alternative stable state with persistently reduced diversity. The non-zero-centred asymptote indicates support for a state transition.

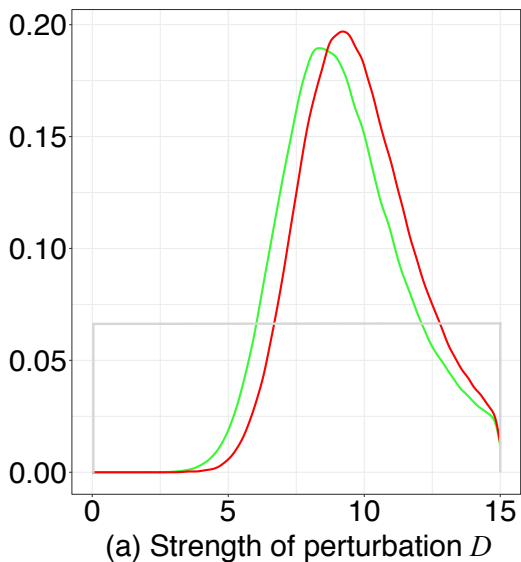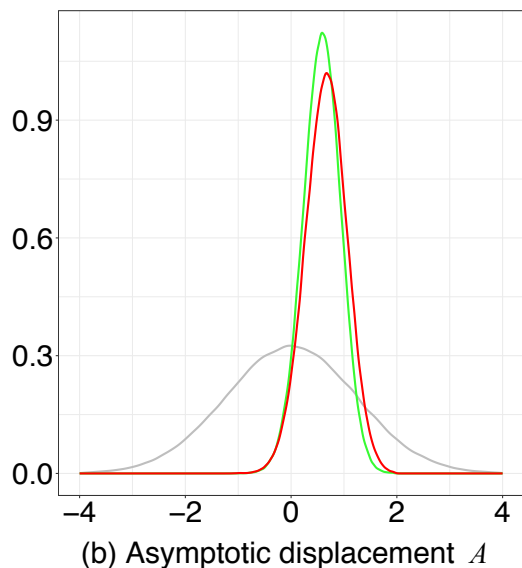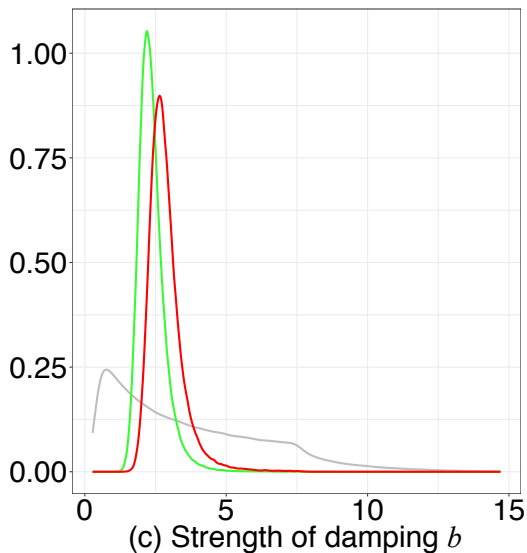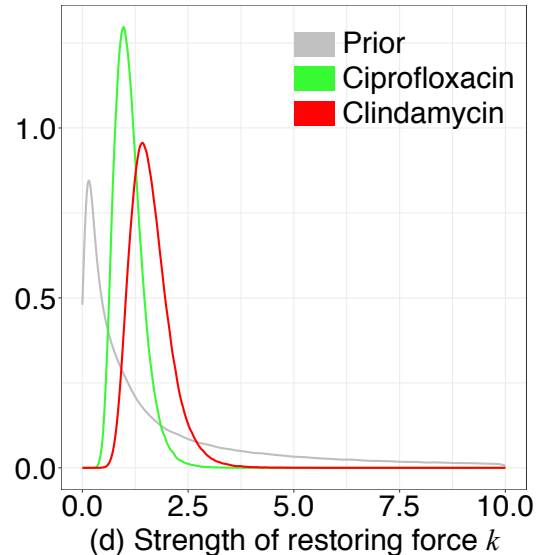

**Figure 4: Posterior parameter estimates for model with a possible transition to an alternative stable state.** The posterior distributions from Bayesian fits of model 2 (eq. 7) to empirical data for ciprofloxacin (green) and clindamycin (red). Each posterior distribution represents 400,000 iterations in total.

## Placebo (n=10)

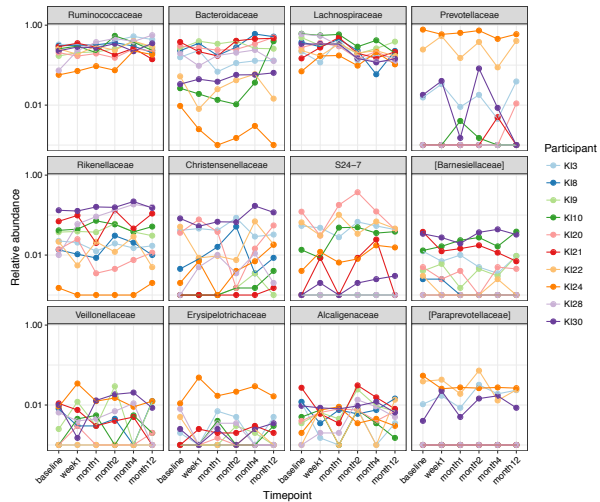

## Clindamycin (n=9)

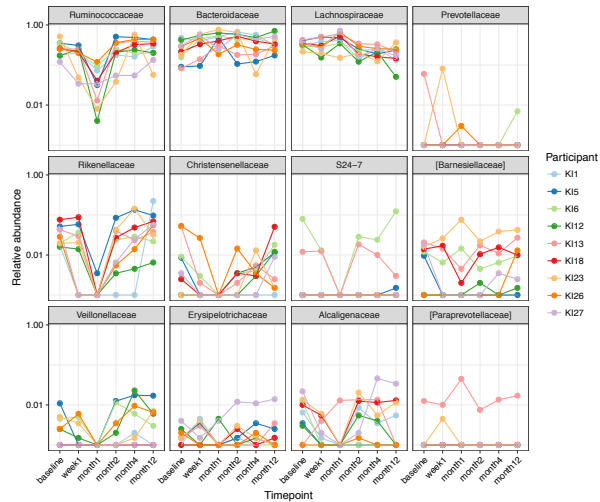

## Ciprofloxacin (n=9)

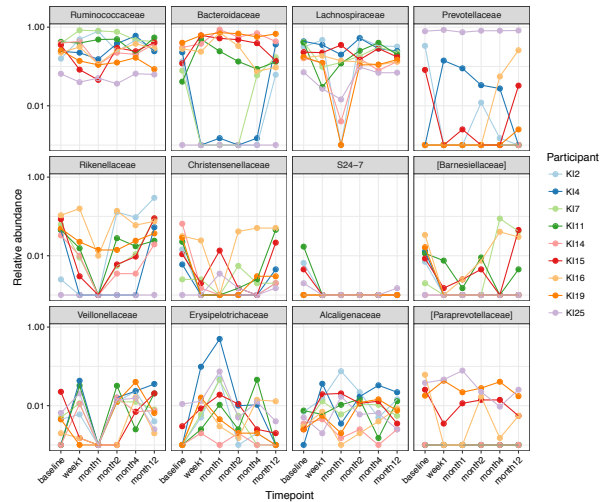

**Supplementary Figure 1: Differences in individual response over time for the top twelve most abundant taxonomic families for each treatment group.** Relative abundances (log-scale) of the top twelve most abundant bacterial families plotted at each sampled timepoint. Observations are linked by coloured lines for each individual. Despite some consistency in changes between antibiotics across individuals, there is inter-individual variability and evidence of possible interactions between bacterial families.
