# 1 **Modelling microbiome recovery after antibiotics using a** 2 **stability landscape framework**

3 **Running title:** Modelling microbiome recovery after antibiotics

## 4 **Authors**

5 Liam P. Shaw<sup>1,2</sup> (liam.philip.shaw@gmail.com)

6 Hassan Bassam<sup>2</sup> (hassan.bassam.17@ucl.ac.uk)

7 Chris P. Barnes<sup>1,4</sup> (christopher.barnes@ucl.ac.uk)

8 A. Sarah Walker<sup>5</sup> (rmjlasw@ucl.ac.uk)

9 Nigel Klein<sup>3</sup> (n.klein@ucl.ac.uk)

10 Francois Balloux<sup>1</sup> (f.balloux@ucl.ac.uk)

## 11 **Affiliations**

12 1: UCL Genetics Institute, UCL, London

13 2: CoMPLEX, UCL, London

14 3: UCL Institute of Child Health, UCL, London

15 4: Cell and Developmental Biology, UCL, London

16 5: MRC Clinical Trials Unit at UCL, UCL, London

17 **Corresponding author:** Liam P. Shaw, liam.philip.shaw@gmail.com

18 **Competing interests:** The authors declare that they have no competing interests.

## 19 **Abstract**

20 Treatment with antibiotics is one of the most extreme perturbations to the human  
21 microbiome. Even standard courses of antibiotics dramatically reduce the microbiome's  
22 diversity and can cause transitions to dysbiotic states. Conceptually, this is often described  
23 as a 'stability landscape': the microbiome sits in a landscape with multiple stable equilibria,  
24 and sufficiently strong perturbations can shift the microbiome from its normal equilibrium to  
25 another state. However, this picture is only qualitative and has not been incorporated in  
26 previous mathematical models of the effects of antibiotics. Here, we outline a simple  
27 quantitative model based on the stability landscape concept and demonstrate its success  
28 on real data. Our analytical impulse-response model has minimal assumptions with three  
29 parameters. We fit this model in a Bayesian framework to previously published data on the  
30 year-long effects of four common antibiotics (ciprofloxacin, clindamycin, minocycline, and  
31 amoxicillin) on the gut and oral microbiomes, allowing us to compare parameters between  
32 antibiotics and microbiomes. Furthermore, using Bayesian model selection we find support  
33 for a long-term transition to an alternative microbiome state after courses of ciprofloxacin  
34 and clindamycin in both the gut and salivary microbiomes. Quantitative stability landscape  
35 frameworks are an exciting avenue for future microbiome modelling.

## 36 **Keywords**

37 Antibiotics, microbiome modelling, gut microbiome, oral microbiome, Bayesian inference,  
38 potential landscapes

39

## 40 Introduction

### 41 Stability and perturbation in the microbiome

42 The human microbiome is a complex ecosystem. While stability is the norm in the gut  
43 microbiome, disturbances and their consequences are important when considering the  
44 impact of the gut microbiome on human health (1). A course of antibiotics is a major  
45 perturbation, typically leading to a marked reduction in species diversity before  
46 subsequent recovery (2). Aside from concerns about the development of antibiotic  
47 resistance, even a brief course can result in long-term effects on community composition,  
48 with species diversity remaining lower than its baseline value for up to a year afterwards  
49 (3). However, modelling the recovery of the microbiome is challenging, due to the difficulty  
50 of quantifying the *in vivo* effects of antibiotics on the hundreds of co-occurring species that  
51 make up typical microbial communities within the human body.

52 Artificial perturbation experiments are widely used to explore the underlying dynamics of  
53 macro-ecological systems (4). In the context of the gut microbiome, the effects of  
54 antibiotics have previously been investigated descriptively (5–7). However, despite interest  
55 in the application of ecological theory to the gut microbiome (8), there has been limited  
56 quantitative or mechanistic modelling of this response. In general, the diversity of the  
57 microbiome falls before recovering, but the nature of this recovery remains unclear. While  
58 responses can appear highly individualized (7) this does not preclude the possibility of  
59 generalized models applicable at the population level.

60 Applying mathematical models to other ecological systems subject to perturbation has  
61 given useful insight into their behaviour (9–11). Crucially, it allows the comparison of  
62 different hypotheses about the behaviour of the system using model selection. Developing

63 a consistent mathematical framework for quantifying the long-term effects of antibiotic use  
64 would facilitate comparisons between different antibiotics and different regimens, with the  
65 potential to inform approaches to antibiotic stewardship (12).

## 66 **Previous modelling approaches**

67 A great deal of modelling work has focused on the gut microbiome's response to antibiotic  
68 perturbation. We mention a few important examples here. Bucci et al. (13) used a two-  
69 compartment density model with species categorised as either antibiotic-tolerant or  
70 antibiotic-sensitive, and fitted their model to data from Dethlefsen and Relman (7) to  
71 demonstrate that these broad categories were appropriate. In a later review, Bucci and  
72 Xavier argued that models of wastewater treatment bioreactors could be adapted for the  
73 gut microbiome, with a focus on individual-based models (14). The most commonly used  
74 individual-based model is the generalized multispecies Lotka-Volterra model, which  
75 describes pairwise interactions between bacterial species (or other groupings). In a  
76 pioneering work, Stein et al. (15) extended a generalized Lotka-Volterra model to include  
77 external perturbations, and fitted their model to a study where mice received clindamycin  
78 and developed *Clostridium difficile* infection (CDI) (16). The same approach was also  
79 successfully applied to human subjects in a later paper, which also identified a probiotic  
80 candidate for treating CDI (17). Bucci et al. (18) have combined and extended their  
81 previous work into an integrated suite of algorithms called MDSINE to infer dynamical  
82 systems models from time-series microbiome data.

83 While all of these models have provided useful insights into microbiome dynamics, to  
84 make meaningful inference from real data they require dense temporal sampling and  
85 restriction to a small number of species or categories. For example, the examples of

86 application of MDSINE had “26–56 time points” for accurate inference of dynamics,  
87 measurements of relative concentrations of bacteria, and frequent shifts of treatment — for  
88 these reasons the *in vivo* experiments were conducted in gnotobiotic mice (18). Similarly,  
89 Stein et al. restricted their analysis of CDI to the ten most abundant bacterial genera (15).  
90 Such restrictions limit the applicability of these methods for the opportunistic analysis of  
91 existing 16S rRNA gene datasets from humans, which currently comprise the majority of  
92 clinically relevant datasets. The generalized Lotka-Volterra model can undoubtedly be  
93 extremely useful for synthetic consortia of small numbers of species, as shown by  
94 Venturelli et al. who inferred the dynamics of a 12-species community (19). However, it  
95 has been shown that even for very small numbers of species, pairwise microbial  
96 interaction models do not always accurately predict future dynamics, suggesting that even  
97 pairwise modelling has its own limitations (20).

98 Starting from broader ecological principles allows quantitative investigation of high-level  
99 statements and hypotheses about microbiome dynamics. For example, Coyte et al. built  
100 network models based on principles from community ecology to show the counter-intuitive  
101 result that competitive interactions in the gut microbiome are associated with stable states  
102 of high diversity, whereas cooperative interactions produce less stable states (21). More  
103 recently, Goyal et al. took inspiration from the ‘stable marriage problem’ in economics and  
104 showed that multiple stable states in microbial communities can be explained by nutrient  
105 preferences and competitive abilities (22). There is therefore great value in exploring  
106 alternative modelling approaches as well as continuing to refine and extend existing  
107 standard models.

## 108 **A stability landscape approach**

109 In one popular schematic picture taken from classical ecology, the state of the gut  
110 microbiome is represented by a ball sitting in a stability landscape (1,23–25). Perturbations  
111 can be thought of as forces acting on the ball to displace it from its equilibrium position  
112 (25) or as alterations of the stability landscape (26). While this image is usually provided  
113 only as a conceptual model to aid thinking about the complexity of the ecosystem, we use  
114 it here to derive a mathematical model.

115 We model the effect of a brief course of antibiotics on the microbial community's  
116 phylogenetic diversity as the impulse response of an overdamped harmonic oscillator  
117 (Figure 1; see Methods), and compare parameters for four widely-used antibiotics by fitting  
118 to empirical data previously published by Zaura et al. (3). This model is significantly less  
119 complicated than other previous models developed for similar purposes, but still captures  
120 some of the essential emergent features of such a system while avoiding the  
121 computational difficulties of fitting hundreds of parameters to a sparse dataset. After  
122 demonstrating the effectiveness of this modelling approach for the gut and oral  
123 microbiomes, we also show that the framework can easily be used to test hypotheses  
124 about microbiome states. We compare a model variant which allows a transition to a new  
125 equilibrium, and find that this model is better supported for clindamycin and ciprofloxacin,  
126 allowing us to conclude that these antibiotics can produce state transitions across different  
127 microbiomes. This modelling approach can be easily applied to sparse datasets from  
128 different human microbiomes and antibiotics, providing a simple but consistent  
129 foundational framework for quantifying the *in vivo* impacts of antibiotics.

## 130 **Results**

### 131 **Ecological theory motivates a simplified representation of the microbiome**

132 Taking inspiration from classical ecological theory, the microbiome can be considered as  
133 an ecosystem existing in a stability landscape: it typically rests at some equilibrium, but  
134 can be displaced (Figure 1A). Any quantitative model of the microbiome based on this  
135 concept requires a definition of equilibrium and displacement. While earlier studies sought  
136 to identify a equilibrium core set of ‘healthy’ microbes, disturbances of which would  
137 quantify displacement, it has become apparent that this is not a practical definition due to  
138 high inter-individual variability in taxonomic composition (25). More recent concepts of a  
139 healthy ‘functional core’ appear more promising, but characterization is challenging,  
140 particularly as many gut microbiome studies use 16S rRNA gene sequencing rather than  
141 whole-genome shotgun sequencing. For these reasons, we choose a metric that offers a  
142 proxy for the general functional potential of the gut microbiome: phylogenetic diversity (25).  
143 Diversity is commonly used as a summary statistic in microbiome analyses and higher  
144 diversity has previously been associated with health (27) and temporal stability (28). Of  
145 course, describing the microbiome using only a single number loses a great deal of  
146 information. However, if we are seeking to build a general model of microbiome recovery  
147 after perturbation, it seems appropriate to consider a simple metric first to see how such a  
148 model performs before developing more complicated definitions of equilibrium, which may  
149 generalise poorly across different niches and individuals.

150 We assume the equilibrium position to have higher diversity than the points immediately  
151 surrounding it (i.e. creating a potential well) (Figure 1B). However, there may be alternative  
152 stable states (Figure 1B) which perturbations may move the microbiome into (Figure 1C).  
153 These states may be either higher or lower in diversity; for our purposes, all we assume is  
154 that they are separated from the initial equilibrium by a potential barrier of diversity i.e. a

155 decrease of diversity is required to access them, which is what keeps the microbiome at  
156 equilibrium under normal conditions.

## 157 **The model**

158 Mathematically, small displacements of a mass from an equilibrium point can be  
159 approximated as a simple harmonic oscillator (29) for any potential function (continuous  
160 and differentiable). This approximation comes naturally from the first terms in the Taylor  
161 expansion of a function (30), and can be extremely accurate for small perturbations. By  
162 assuming the local stability landscape of the microbiome can be reasonably approximated  
163 as a harmonic potential, we are assuming a ‘restoring’ force proportional to the  
164 displacement  $x$  from the equilibrium position ( $-kx$ ) and also a ‘frictional’ force acting  
165 against the direction of motion ( $-b\dot{x}$ ). The system is a damped harmonic oscillator with the  
166 following equation of motion:

$$167 \quad (1) \quad \frac{d^2x}{dt^2} + b \frac{dx}{dt} + kx = 0$$

168 Additional forces acting on the system — perturbations — will appear on the right-hand  
169 side of this equation. Consider a course of antibiotics of duration  $\tau$ . If we are interested in  
170 timescales of  $T \gg \tau$  (e.g. the long-term recovery of the microbiome a year after a week-  
171 long course of antibiotics) we can assume that this perturbation is of negligible duration.  
172 This assumption allows us to model it as an impulse of magnitude  $D$  acting at time  $t = 0$ :

$$173 \quad (2) \quad \frac{d^2x}{dt^2} + b \frac{dx}{dt} + kx = D\delta(t)$$

174 This second-order differential equation can be solved analytically and reparameterised  
175 (see Methods) to give an equation with three parameters for fitting to empirical data (Model  
176 1, Figure 1C):



177 (3) 
$$x_1(t) = \frac{De^{\phi_1}\phi_2}{e^{\phi_2}-e^{\phi_1}} \cdot (e^{-e^{\phi_1}t} - e^{-e^{\phi_2}t})$$

178 **Fitting the model to empirical data for four common antibiotics**

179 We fit the model to published data from a paper from Zaura et al. (3) where individuals  
180 received a ten-day course of either a placebo or one of four commonly-used antibiotics  
181 (Table 1). Faecal and saliva samples were taken at baseline (i.e. before treatment), then  
182 subsequently directly after treatment, then one month, two months, four months, and one  
183 year after treatment. Zaura et al. conducted pairwise comparisons between timepoints and  
184 comprehensively reported statistical associations, but did not attempt any explicit  
185 modelling of the time-response over the year.

186 In summary, this dataset provides an ideal test case for our model. Not only does it allow  
187 us to simultaneously model the recovery of both the gut and oral microbiomes after  
188 different antibiotics, but it also demonstrates how our modelling framework permits further  
189 conclusions beyond the scope of the initial study.

190 **A stability landscape framework successfully describes initial microbiome**  
191 **dynamics**

192 We used a Bayesian approach to fit the model to each treatment group and microbiome  
193 separately. The model successfully captured the main features of the initial response to  
194 antibiotics (Figure 2). Diversity decreased (i.e. displacement from equilibrium increased)  
195 before a slow return to equilibrium. Despite large variability between samples from the  
196 same treatment group, reassuringly the placebo group clearly did not warrant an impulse  
197 response model, whereas data from individuals receiving antibiotics was qualitatively in  
198 agreement with the model. Even without the model, it is apparent that clindamycin and  
199 ciprofloxacin represent greater disturbances to the microbiome than minocycline and

200 amoxicillin, but a consistent model allows comparison of the values of various parameters  
201 (see below).

202 In their original analysis, Zaura et al. noted significantly ( $p < 0.05$ ) reduced Shannon  
203 diversity in individuals receiving ciprofloxacin comparing samples after a year to baseline  
204 using a GLM repeated measure test. This reduced diversity could in principle merely be  
205 due to slow reconstitution and return to the original equilibrium under the dynamics we  
206 have described. However, by normalising each individual's data relative to their specific  
207 baseline and fitting the model (taking into account the whole continuous temporal  
208 response rather than pairwise comparisons of absolute diversity) it appears that slow  
209 reconstitution cannot be the whole story. Instead, the skewed distribution of residuals after  
210 a year, when the response has flattened off, indicates that the longer-term dynamics of the  
211 system do not obey the same impulse response as the short-term dynamics. A scenario  
212 involving a long-term transition to an alternative stable state is consistent with this  
213 observation (Figure 1). We therefore developed a variant of the model to take into account  
214 alternative equilibria, aiming to test the hypothesis that the microbiome had transitioned to  
215 an alternative stable state.

## 216 **A model allowing antibiotic-induced state transitions**

217 In our approach, a transition to an alternative stable state means that the value of diversity  
218 displacement from the original equilibrium will asymptotically tend to a non-zero value.

219 There are many options for representing this mathematically; for reasons of model  
220 simplicity, we adopt one that requires only one additional parameter (Model 2, Figure 1C):

$$221 \quad (4) \quad x_2(t) = \frac{De^{\phi_1 e^{\phi_2}}}{e^{\phi_2} - e^{\phi_1}} \cdot \left( e^{-e^{\phi_1} t} - e^{-e^{\phi_2} t} \right) + A \cdot \left( 1 - e^{-e^{\phi_1} t} \right)$$

## 222 **Support for the existence of antibiotic-induced state transitions**

223 Qualitatively, this slightly more complex model gave a similar fit (Figure 3) but some  
224 treatment groups had a clear non-zero final displacement from equilibrium, corresponding  
225 to an alternative stable state. We compared models with the Bayes factor  $BF$ , where  
226  $BF > 1$  indicates greater support for model 2 i.e. positive evidence for a state transition  
227 (Table 2). A state transition was supported ( $BF > 3$ ) in the ciprofloxacin and clindamycin  
228 treatment groups for both the gut and oral microbiome. Interestingly, the posterior  
229 estimates for the asymptote parameter in the gut microbiome were substantially positively  
230 skewed (Figure 4), providing evidence of a transition to a state with lower phylogenetic  
231 diversity than the baseline. Contrastingly, in the oral microbiome the asymptote parameter  
232 was negatively skewed, suggesting a transition to a state with greater phylogenetic  
233 diversity. Strikingly, these are the states associated with poorer health in each of the gut  
234 and oral microbiomes.

### 235 **Comparison of parameters between antibiotics**

236 Comparing the posterior distribution of parameters for model 2 fits allows quantification of  
237 ecological impact of different antibiotics (Table 3, Figure 4). Unsurprisingly, greater  
238 perturbation is correlated with the transition to an alternative stable state. We can also  
239 consider the ecological implications of the parameters we observe. The damping ratio  
240  $\zeta = b/(2\sqrt{k})$  summarises how perturbations decay over time, and is an inherent property  
241 of the system independent of the perturbation itself. Therefore, if our modelling framework  
242 and ecological assumptions were valid we would expect to find a consistent damping ratio  
243 across both the clindamycin and ciprofloxacin groups in the gut microbiome. This is indeed  
244 what we observed with median (95% credible interval) damping ratios of  $\zeta_{\text{clinda}}=1.07$  (1.00-

245 1.65) and  $\zeta_{\text{cipro}}=1.07$  (1.00-1.66), substantially different from the prior distribution,  
246 supporting the view of the gut microbiome as a damped harmonic oscillator.

### 247 **A complex, individualized antibiotic response still allows a general model**

248 While it is not our intention to repeat a comprehensive description of the precise nature of  
249 the response for the different antibiotics, we note some interesting qualitative observations  
250 from our reanalysis that highlight the complexity of the antibiotic response. We discuss  
251 here observations at the level of taxonomic family in the gut microbiomes of individuals  
252 taking ciprofloxacin or clindamycin (Supplementary File 1). While modelling these precise  
253 interactions is far beyond the scope of our model, our approach can still summarise the  
254 overall impact of this underlying complexity on the community as a whole.

255 Despite their different mechanisms of action, both clindamycin and ciprofloxacin caused a  
256 dramatic decrease in the Gram-negative anaerobes *Rikenellaceae*, which was most  
257 marked a month after the end of the course. However, for ciprofloxacin this decrease had  
258 already started immediately after treatment, whereas for clindamycin the abundance after  
259 treatment was unchanged in most participants. The different temporal nature of this  
260 response perhaps reflects the bacteriocidal nature of ciprofloxacin (32) compared to the  
261 bacteriostatic effect of clindamycin, although concentrations *in vivo* can produce  
262 bacteriocidal effects (33).

263 There were other clear differences in response between antibiotics. For example,  
264 clindamycin caused a decrease in the anaerobic Gram-positives *Ruminococcaceae* after a  
265 month, whereas ciprofloxacin had no effect. There was also an individualized response:  
266 ciprofloxacin led to dramatic increases in *Erysipelotrichaceae* for some participants, and

267 for these individuals the increases coincided with marked decreases in *Bacteroidaceae*,  
268 suggesting the relevance of inter-family microbial interactions (Supplementary File 1).  
269 Comparing relative abundances at the family level, there were few differences between  
270 community states of different treatment groups after a year. Equal phylogenetic diversity  
271 can be produced by different community composition, and this suggests against consistent  
272 trends in the long-term dysbiosis associated with each antibiotic. However, we did find that  
273 *Peptostreptococcaceae*, a member of the order *Clostridiales*, was significantly more  
274 abundant in the clindamycin group when compared to both the ciprofloxacin group and the  
275 placebo group separately ( $p < 0.05$ , Wilcoxon rank sum test). In a clinical setting,  
276 clindamycin is well-established to lead to an increased risk of a life-threatening infection  
277 caused by another member of *Clostridiales*: *Clostridium difficile* (34). Long-term reductions  
278 in diversity may similarly increase the risk of overgrowth of pathogenic species.

### 279 **Connection to generalized Lotka-Volterra models**

280 We sought to establish a link between our framework and the conventional ‘bottom-up’  
281 approach of generalized Lotka-Volterra models. We investigated the behaviour of a 3  
282 species Lotka-Volterra system to establish if perturbation to an alternative state was  
283 possible in this simple case (see Supplementary File 7). We found that only 0.079% of 3-  
284 species Lotka-Volterra systems exhibit the behaviour required by our two-state model,  
285 suggesting that this model is unrealistic for small numbers of species (as we assume that  
286 diversity is a continuous variable). However, for larger numbers of species, theoretical  
287 ecology gives a strong justification for our assumptions. It has recently been shown that as  
288 the number of species  $n$  increases, the number of fixed points which are stable increases  
289 independently of population size (35), and the proportion of simulations from random

290 parameters that have multiple fixed points also increases: with  $n = 400$ , this proportion is  
291 >97% (36). This suggests that the overwhelming majority of *mathematically possible*  
292 systems at relevant numbers of species exhibit multiple fixed points; the fraction of  
293 *biologically possible* systems exhibiting this behaviour is likely even higher. Furthermore,  
294 when resource competition is incorporated — a more realistic assumption in the case of  
295 the human microbiome — all these fixed points become stable or marginally stable (36).  
296 The gut microbiome is an ecosystem of hundreds of species in the presence of resource  
297 competition. Goyal et al. recently showed that multiple resilient stable states can exist in  
298 microbial communities if microbes utilize nutrients one at a time (22). We can therefore  
299 state confidently that: the gut microbiome exists with multiple stable equilibria; its  
300 community composition is history-dependent; and perturbations lead to transitions  
301 between the multiple possible stable states. All of these assumptions justify the simplistic  
302 coarse-grained model we describe here, which effectively takes these high-level emergent  
303 properties of multi-species Lotka-Volterra models to build a substantially simpler model  
304 based on a single, commonly-used metric: diversity.

## 305 **Discussion**

306 Starting from a common conceptual picture of the microbiome as resting within a stability  
307 landscape, we have developed a mathematical model of its response to perturbation by  
308 antibiotics. Our framework, based on phylogenetic diversity, successfully captures the  
309 dynamics of a previously published dataset for four common antibiotics (3), providing  
310 quantitative support for these simplifying ecological assumptions. Using model selection,  
311 our framework provides additional insight compared to other methods — we identify a

312 state transition in the oral microbiome with clindamycin, which was not detected by the  
313 initial authors using a GLM repeated measures test.

314 While pairwise comparisons based on diversity can still identify differences in microbiome  
315 state, they provide no information on microbiome dynamics. Our dynamical systems  
316 approach therefore also gives additional mechanistic insight in this regard. Zaura et al.  
317 observed that the lowest diversity in the gut microbiome was observed after a month rather  
318 than immediately after treatment stopped (3). This cannot be due to a persistence of the  
319 antibiotic effect, as all antibiotics used only have short half-lives of the order of hours  
320 (37,38). Within our framework, this is because the full effects of the transient impulse take  
321 time to be realised due to the overdamped nature of the system. We found a consistent  
322 damping ratio for both ciprofloxacin and clindamycin, supporting this conclusion.

323 We have also demonstrated how our modelling framework could be used to compare  
324 different hypotheses about the long-term effects of antibiotic perturbation by fitting different  
325 models and using Bayesian model selection. Our modelling work provides an additional  
326 line of evidence that while short-term restoration obeys a simple impulse response model,  
327 the underlying long-term community state can be fundamentally altered by a brief course  
328 of antibiotics, as suggested previously by others (7), raising concerns about the long-term  
329 impact of antibiotic use on the gut microbiome. While this state transition may not  
330 necessarily equate to any negative health impacts for the host (none of the participants  
331 involved in the original study reported any gastrointestinal disturbance), in the gut  
332 microbiome the transition to a new state with reduced diversity may increase the risk of  
333 colonisation and overgrowth of pathogenic species. Interestingly, in the salivary  
334 microbiome the transition appeared to be to a state with increased diversity, which is  
335 associated with a greater risk of disease in the oral cavity (39). This observation was not

336 noted by Zaura et al. — a significant difference was detected in diversity in one antibiotic  
337 but was relegated to a supplementary figure and not discussed (3) — perhaps because it  
338 appeared contradictory to their other conclusions. However, we believe it makes sense  
339 within a stability landscape framework. Even if only marginal, when considered at a  
340 population level these effects may mean that antibiotics have substantial negative health  
341 consequences which could support reductions in the length of antibiotic courses,  
342 independently of concerns about antibiotic resistance (40). Modelling the long-term impact  
343 on the microbiome of different doses and courses could help to influence the use of  
344 antibiotics in routine clinical care. Our sample size is small, so the precise posterior  
345 estimates for parameters that we obtain should not be over-interpreted, but comparing  
346 antibiotics using these parameter estimates represents another practical application.

347 Our framework lends itself naturally to comparing different dynamical models. We see our  
348 two variant models as a starting point for a stability landscape approach, and would hope  
349 that better models can be constructed. Hierarchical mixed effects models may offer an  
350 improved fit, particularly if they take into account other covariates; however, we lacked the  
351 necessary metadata on the participants from the original study (Table 1) to explore the  
352 performance of such models. Furthermore, diversity as a single metric clearly fails to  
353 capture all the complexity of the microbial community and its interactions, and there are  
354 multiple issues with calculating it accurately. Nevertheless, the observation that treating  
355 phylogenetic diversity as the key variable in the stability landscape captures microbiome  
356 dynamics supports observations of functional redundancy in the gut microbiome (27). An  
357 interesting extension of this work would be to systematically fit the model to a variety of  
358 diversity metrics or other summary statistics and assess the model fit to see which metric  
359 (or combination of metrics) is most appropriately interpreted as the state variable



360 parameterising the stability landscape. A possible complementary approach could  
361 consider or incorporate the resistome, which should conversely rise in diversity after  
362 antibiotic treatment (41).

363 We would not expect the behaviour of the microbiome after longer or repeated courses of  
364 antibiotics to be well-described by an impulse response model which assumes the course  
365 is of negligible duration. Nevertheless, it would be possible to use the mathematical  
366 framework given here to obtain an analytic form for the possible system response by  
367 convolving any given perturbation function with the impulse response. It remains to be  
368 seen whether this simple model would break down in such circumstances.

369 As we have demonstrated, while the individualized nature of the gut microbiome's  
370 response to antibiotics can be highly variable, a general model still captures important  
371 microbiome dynamics. We believe it would be a mistake to assume that our model is 'too  
372 simple' to provide insight on a complex ecosystem. At this stage of our understanding,  
373 creating a comprehensive inter-species model of the hundreds of members of the gut  
374 microbiome appears intractable; it may also not be necessary for building simple models to  
375 inform clinical treatment based on limited and sparse data. We believe there is a place for  
376 both fine-grained models using pairwise interactions — particularly for systems of reduced  
377 complexity — and coarse-grained models built from high-level ecological principles, as we  
378 have demonstrated here. We have argued that this 'top-down' framework with multiple  
379 stable states of different diversities is consistent with the emergent behaviour of a  
380 multispecies Lotka-Volterra model. Further mathematical work to connect these two  
381 extremes would be worthwhile.

## 382 **Acknowledgements**

383 LPS was supported by the Engineering and Physical Sciences Research Council  
384 [EP/F500351/1] and the Reuben Centre for Paediatric Virology and Metagenomics. CPB is  
385 supported by the Wellcome Trust [097319/Z/11/Z]. We are grateful to the authors of the  
386 original study (3) for making their data openly available, enabling the reanalysis with our  
387 modelling framework presented here.

388 **Authors' contributions:** LPS conceived the model, performed analyses, and wrote the  
389 paper. LPS, CPB, HB, and FB conceived the analysis of the Lotka-Volterra system, which  
390 was performed by HB. All authors contributed to the discussion and development of the  
391 model, gave comments, and read and approved the final manuscript.

## 392 **Competing interests**

393 The authors declare that they have no competing interests.

## 394 **Data availability**

395 The original sequencing dataset from Zaura et al. (3) used in this paper is available in the  
396 Short Read Archive (SRA Accession: [SRP057504](https://www.ncbi.nlm.nih.gov/sra/SRP057504)). Full code and reanalyzed datasets  
397 supporting the conclusions of this article are included as Supplementary Information  
398 (Supplementary Files 2—8). A full archive of analyses including cached model fits is  
399 available in figshare (<https://figshare.com/s/d62d6e90f96dc63c2769>.)

## 400 **Materials and methods**

### 401 **Mathematical model of trajectories in the potential landscape**

402 Treating the microbiome as a unit mass resting in a stability landscape parameterised by  
403 phylogenetic diversity leads to a second-order differential equation. To solve this equation,

404 we assume that  $b^2 > 4k$  (the ‘overdamped’ case) based on the lack of any oscillatory  
405 behaviour previously observed in the microbiome, to the best of our knowledge. Then,  
406 subject to the initial conditions  $x(0^+) = 0$  and  $\dot{x}(0^+) = D$  we obtain the following equation  
407 describing the system’s trajectory:

$$408 \quad (5) \quad x(t) = \frac{D}{2 \cdot \sqrt{\left(\frac{b}{2}\right)^2 - k}} \left( e^{-\left(\frac{b}{2} - \sqrt{\left(\frac{b}{2}\right)^2 - k}\right)t} - e^{-\left(\frac{b}{2} + \sqrt{\left(\frac{b}{2}\right)^2 - k}\right)t} \right)$$

409 Fitting the model therefore requires fitting three parameters:  $b$  (the damping on the  
410 system),  $k$  (the strength of the restoring force), and  $D$  (how strong the perturbation is). For  
411 the purposes of fitting the model, we choose to reparameterise the model using the  
412 following definitions:

$$413 \quad (6) \quad b = e^{\phi_1} + e^{\phi_2}$$

$$414 \quad (7) \quad k = e^{\phi_1 + \phi_2}$$

415 Resulting in the following model (Model 1, Figure 1C):

$$416 \quad (8) \quad x_1(t) = \frac{De^{\phi_1 e^{\phi_2}}}{e^{\phi_2 - e^{\phi_1}}} \cdot \left( e^{-e^{\phi_1} t} - e^{-e^{\phi_2} t} \right)$$

417 Antibiotics may lead not just to displacement from equilibrium, but also state transitions to  
418 new equilibria (2). To investigate this possibility, we also consider a model where the value  
419 of equilibrium diversity asymptotically tends to a new value  $A$  (Model 2, Figure 1C). As we  
420 are aiming to minimise model complexity, we do this by adding a single parameter and a  
421 term that asymptotically grows as time increases:

$$422 \quad (8) \quad x_2(t) = \frac{De^{\phi_1 e^{\phi_2}}}{e^{\phi_2 - e^{\phi_1}}} \cdot \left( e^{-e^{\phi_1} t} - e^{-e^{\phi_2} t} \right) + A \cdot \left( 1 - e^{-e^{\phi_1} t} \right)$$

423 **Experimental data**

424 To validate our model and test whether antibiotic perturbation caused a state transition we  
425 fitted both models to an empirical dataset and compared the results. Zaura et al. (3)  
426 conducted a study on the long-term effect of antibiotics on the gut microbiome which  
427 provides an ideal test dataset. As part of this study, individuals were randomly assigned to  
428 one of five treatment groups: placebo, clindamycin, ciprofloxacin, minocycline, amoxicillin.  
429 The antibiotics  
430 and placebo were administered for at most  $\tau = 10$  days (150 mg clindamycin four times a  
431 day for ten days; 500 mg ciprofloxacin twice a day for ten days; 250 mg amoxicillin three  
432 times daily for seven days; 100mg minocycline twice daily for five days) and longitudinal  
433 faecal and saliva samples collected until  $T = 1$  year afterwards i.e.  $\frac{\tau}{T} \sim 0.027 \ll 1$ , so the  
434 approximation of the antibiotics as an impulse perturbation should be valid. Samples were  
435 collected at baseline, after treatment, one month, two months, four months, and one year.  
436 Samples underwent 16S rRNA gene amplicon sequencing, targeting the V5-V7 region  
437 (SRA Accession: SRP057504). We reanalysed this data, performing de novo clustering  
438 into operational taxonomic units (OTUs) at 97% similarity with VSEARCH v1.1.1 (42) with  
439 chimeras removed against the 16S gold database (<http://drive5.com/uchime/gold.fa>).  
440 Taxonomy was assigned with RDP (43). For more details see Supplementary File 2. The  
441 reanalyzed datasets are available as R phyloseq objects (Supplementary Files 3 and 4).  
442 We found no association between sequencing depth and timepoint.

### 443 **Phylogenetic diversity**

444 There are many possible diversity metrics that could be used to compute the displacement  
445 from equilibrium. Because of our assumption that phylogenetic diversity approximates  
446 functional potential, which is itself a proxy for ecosystem 'health' (see 'Ecological

447 assumptions'), we chose to use Faith's phylogenetic diversity (44) calculated with the pd()  
448 function in the 'picante' R package v1.6-2 (45). Calculating this branch-weighted  
449 phylogenetic diversity requires a phylogeny, which we produced with FastTree v2.1.10  
450 (46) after aligning 16S rRNA V5-V7 OTU sequences with Clustal Omega v1.2.1 (47). To  
451 obtain values for fitting the model, we used mean bootstrapped values ( $n = 100$ , sampling  
452 depth  $r = 1\ 000$ ) of phylogenetic diversity  $d_i$  relative to the baseline phylogenetic diversity  
453  $d_0$  for each individual (Supplementary File 1), representing the displacement from  
454 equilibrium in our model:

$$455 \quad (8) \quad \bar{d}_i = d_i - d_0$$

#### 456 **Bayesian model fitting**

457 We used a Bayesian framework to fit our basic model 1 (eq. 3) using Stan (48) and RStan  
458 (49) to the gut and oral microbiome samples for the five separate groups: placebo,  
459 ciprofloxacin, clindamycin, minocycline, and amoxicillin (i.e.  $n=2 \times 5=10$  fits). In brief, our  
460 approach used 4 chains with a burn-in period of 1 000 iterations and 9 000 subsequent  
461 iterations, verifying that all chains converged ( $\hat{R} = 1$ ) and the effective sample size for each  
462 parameter was sufficiently large ( $\text{neff} > 1\ 000$ ). We additionally fitted model 2 with a  
463 possible state transition (eq. 4) to all non-placebo groups ( $n=2 \times 4=8$  fits).

464 We used non-informative priors for all parameters in the original model 1 without a state  
465 transition (eq. 3). For all groups, we used the same uniformly distributed prior for  $D$   
466 (positive i.e. decrease in diversity) and uniform priors for  $\phi_1, \phi_2$ . For fitting model 2, we  
467 used an additional uniform prior centred at zero for the new equilibrium value  $A$  and the  
468 same priors for other parameters. In summary, the priors are as follows:

$$469 \quad (9.1) \quad D \sim \text{uniform}(0, 10)$$

470 (9.2)  $\phi_1 \sim \text{uniform}(-1.99, 1.99)$

471 (9.3)  $\phi_2 \sim \text{uniform}(-2, 2)$

472 (9.4)  $A \sim \text{uniform}(-2, 2)$

473 We compared models 1 and 2 (Supplementary Files 5 and 6). for each antibiotic treatment  
474 group using the Bayes factor (31,50) after extracting the model fits using bridge sampling  
475 with the bridgesampling R package v0.2-2 (51). A prior sensitivity analysis (not shown)  
476 showed that choice of priors did not affect our conclusions about model selection, although  
477 the strength of the Bayes factor varied.

478 Full code for fitting the models to empirical data and reproducing figures is available with  
479 this article (Supplementary Files 2—6).

#### 480 **Lotka-Volterra simulations**

481 We numerically simulated  $5^9 = 1\,953\,125$  parameter sets of the Lotka-Volterra model with  
482  $n=3$  species and investigated their behaviour and stable states. For more details see the  
483 corresponding supplementary discussion (Supplementary File 7) and Mathematica  
484 notebook (Supplementary File 8).

#### 485 **References**

- 486 1. Relman DA. The human microbiome: ecosystem resilience and health. *Nutr Rev*  
487 [Internet]. NIH Public Access; 2012 Aug [cited 2016 Oct 17];70(Supplement 1):S2–9.  
488 Available from: <http://www.ncbi.nlm.nih.gov/pubmed/22861804>
- 489 2. Modi SR, Collins JJ, Relman DA. Antibiotics and the gut microbiota. *J Clin Invest*  
490 [Internet]. American Society for Clinical Investigation; 2014 Oct 1 [cited 2017 Nov  
491 28];124(10):4212–8. Available from: <https://www.jci.org/articles/view/72333>

- 492 3. Zaura E, Brandt BW, Teixeira de Mattos MJ, Buijs MJ, Caspers MPM, Rashid M-U,  
493 et al. Same Exposure but Two Radically Different Responses to Antibiotics:  
494 Resilience of the Salivary Microbiome versus Long-Term Microbial Shifts in Feces.  
495 MBio [Internet]. American Society for Microbiology; 2015 Nov 10 [cited 2016 Oct  
496 17];6(6):e01693-15. Available from: <http://www.ncbi.nlm.nih.gov/pubmed/26556275>
- 497 4. Wootton JT. Experimental species removal alters ecological dynamics in a natural  
498 ecosystem. Ecology [Internet]. 2010 Jan [cited 2017 Mar 13];91(1):42–8. Available  
499 from: <http://www.ncbi.nlm.nih.gov/pubmed/20380194>
- 500 5. Sullivan Å, Edlund C, Nord CE. Effect of antimicrobial agents on the ecological  
501 balance of human microflora. Lancet Infect Dis [Internet]. 2001 [cited 2017 May  
502 12];1(2):101–14. Available from:  
503 <http://www.sciencedirect.com/science/article/pii/S1473309901000664>
- 504 6. Dethlefsen L, Huse S, Sogin ML, Relman DA. The pervasive effects of an antibiotic  
505 on the human gut microbiota, as revealed by deep 16S rRNA sequencing. PLOS  
506 Biol [Internet]. 2008 Nov 18 [cited 2017 Mar 14];6(11):e280. Available from:  
507 <http://www.ncbi.nlm.nih.gov/pubmed/19018661>
- 508 7. Dethlefsen L, Relman DA. Incomplete recovery and individualized responses of the  
509 human distal gut microbiota to repeated antibiotic perturbation. PNAS [Internet].  
510 2011 Mar 15 [cited 2017 Dec 2];108(Supplement 1):4554–61. Available from:  
511 <http://www.ncbi.nlm.nih.gov/pubmed/20847294>
- 512 8. Pepper JW, Rosenfeld S. The emerging medical ecology of the human gut  
513 microbiome. Trends Ecol Evol [Internet]. 2012 Jul [cited 2017 Mar 13];27(7):381–4.  
514 Available from: <http://www.ncbi.nlm.nih.gov/pubmed/22537667>

- 515 9. Skellam JG. Random dispersal in theoretical populations. *Biometrika* [Internet].  
516 Oxford University Press; 1951 [cited 2017 May 12];38(1–2):196–218. Available from:  
517 <https://academic.oup.com/biomet/article-lookup/doi/10.1093/biomet/38.1-2.196>
- 518 10. May RM. *Stability and complexity in model ecosystems*. Princeton: Princeton  
519 University Press; 1973. 265 p.
- 520 11. Scheffer M, Carpenter S, Foley JA, Folke C, Walker B. Catastrophic shifts in  
521 ecosystems. *Nature* [Internet]. Nature Publishing Group; 2001 Oct 11 [cited 2017  
522 May 12];413(6856):591–6. Available from:  
523 <http://www.nature.com/doi/10.1038/35098000>
- 524 12. Doron S, Davidson LE. Antimicrobial stewardship. *Mayo Clin Proc* [Internet]. Mayo  
525 Foundation; 2011 Nov [cited 2017 May 12];86(11):1113–23. Available from:  
526 <http://www.ncbi.nlm.nih.gov/pubmed/22033257>
- 527 13. Bucci V, Bradde S, Biroli G, Xavier JB. Social Interaction, Noise and Antibiotic-  
528 Mediated Switches in the Intestinal Microbiota. De Boer RJ, editor. *PLoS Comput  
529 Biol* [Internet]. 2012 Apr 26 [cited 2018 Jun 25];8(4):e1002497. Available from:  
530 <http://www.ncbi.nlm.nih.gov/pubmed/22577356>
- 531 14. Bucci V, Xavier JB. Towards predictive models of the human gut microbiome. *J Mol  
532 Biol* [Internet]. 2014 Nov 25 [cited 2015 Feb 12];426(23):3907–16. Available from:  
533 <http://www.sciencedirect.com/science/article/pii/S0022283614001788>
- 534 15. Stein RR, Bucci V, Toussaint NC, Buffie CG, Räscht G, Pamer EG, et al. Ecological  
535 modeling from time-series inference: insight into dynamics and stability of intestinal  
536 microbiota. *PLOS Comput Biol* [Internet]. 2013 Jan 12 [cited 2014 Jul  
537 18];9(12):e1003388. Available from:



- 538 <http://journals.plos.org/ploscompbiol/article?id=10.1371/journal.pcbi.1003388>
- 539 16. Buffie CG, Jarchum I, Equinda M, Lipuma L, Gobourne A, Viale A, et al. Profound  
540 alterations of intestinal microbiota following a single dose of clindamycin results in  
541 sustained susceptibility to *Clostridium difficile*-induced colitis. McCormick BA, editor.  
542 *Infect Immun* [Internet]. 2012 Jan [cited 2018 Jun 25];80(1):62–73. Available from:  
543 <http://iai.asm.org/lookup/doi/10.1128/IAI.05496-11>
- 544 17. Buffie CG, Bucci V, Stein RR, McKenney PT, Ling L, Gobourne A, et al. Precision  
545 microbiome reconstitution restores bile acid mediated resistance to *Clostridium*  
546 *difficile*. *Nature* [Internet]. Nature Publishing Group, a division of Macmillan  
547 Publishers Limited. All Rights Reserved.; 2014 Oct 22 [cited 2014 Oct  
548 22];517(7533):205–8. Available from: <http://dx.doi.org/10.1038/nature13828>
- 549 18. Bucci V, Tzen B, Li N, Simmons M, Tanoue T, Bogart E, et al. MDSINE: Microbial  
550 Dynamical Systems INference Engine for microbiome time-series analyses. *Genome*  
551 *Biol* [Internet]. 2016 Dec 3 [cited 2016 Nov 15];17(1):121. Available from:  
552 <http://genomebiology.biomedcentral.com/articles/10.1186/s13059-016-0980-6>
- 553 19. Venturelli OS, Carr AC, Fisher G, Hsu RH, Lau R, Bowen BP, et al. Deciphering  
554 microbial interactions in synthetic human gut microbiome communities. *Mol Syst Biol*  
555 [Internet]. EMBO Press; 2018 Jun 21 [cited 2018 Jul 5];14(6):e8157. Available from:  
556 <http://www.ncbi.nlm.nih.gov/pubmed/29930200>
- 557 20. Momeni B, Xie L, Shou W. Lotka-Volterra pairwise modeling fails to capture diverse  
558 pairwise microbial interactions. *Elife* [Internet]. eLife Sciences Publications Limited;  
559 2017 Mar 28 [cited 2017 Nov 6];6:e25051. Available from:  
560 <https://elifesciences.org/articles/25051>

- 561 21. Coyte KZ, Schluter J, Foster KR. The ecology of the microbiome: Networks,  
562 competition, and stability. *Science* (80- ) [Internet]. 2015 Nov 6;350(6261):663–6.  
563 Available from: <http://www.sciencemag.org/cgi/doi/10.1126/science.aad2602>
- 564 22. Goyal A, Dubinkina V, Maslov S. Multiple stable states in microbial communities  
565 explained by the stable marriage problem. *ISME J* [Internet]. Nature Publishing  
566 Group; 2018 Jul 19 [cited 2018 Sep 17];1. Available from:  
567 <http://www.nature.com/articles/s41396-018-0222-x>
- 568 23. Holling CS. Resilience and stability of ecological systems. *Annu Rev Ecol Syst*  
569 [Internet]. 1973;4:1–23. Available from:  
570 <http://www.annualreviews.org/doi/abs/10.1146/annurev.es.04.110173.000245>
- 571 24. Lemon KP, Armitage GC, Relman DA, Fischbach MA. Microbiota-targeted therapies:  
572 an ecological perspective. *Sci Transl Med* [Internet]. 2012 Jun 6 [cited 2017 Mar  
573 13];4(137):137rv5. Available from:  
574 <http://stm.sciencemag.org/cgi/doi/10.1126/scitranslmed.3004183>
- 575 25. Lloyd-Price J, Abu-Ali G, Huttenhower C. The healthy human microbiome. *Genome*  
576 *Med* [Internet]. 2016 Dec 27 [cited 2017 Sep 17];8(1):51. Available from:  
577 <http://genomemedicine.biomedcentral.com/articles/10.1186/s13073-016-0307-y>
- 578 26. Costello EK, Stagaman K, Dethlefsen L, Bohannan BJM, Relman DA. The  
579 Application of Ecological Theory Toward an Understanding of the Human  
580 Microbiome. *Science* (80- ) [Internet]. 2012 Jun 8 [cited 2015 Feb  
581 24];336(6086):1255–62. Available from:  
582 <http://www.sciencemag.org/content/336/6086/1255>
- 583 27. Turnbaugh PJ, Ley RE, Hamady M, Fraser-Liggett CM, Knight R, Gordon JI. The

- 584 Human Microbiome Project. Nature [Internet]. Nature Publishing Group; 2007 Oct 18  
585 [cited 2017 Mar 8];449(7164):804–10. Available from:  
586 <http://www.nature.com/doi/10.1038/nature06244>
- 587 28. Flores GE, Caporaso JG, Henley JB, Rideout JR, Domogala D, Chase J, et al.  
588 Temporal variability is a personalized feature of the human microbiome. Genome  
589 Biol [Internet]. BioMed Central; 2014 Dec 3 [cited 2017 Oct 27];15(12):531. Available  
590 from: <http://genomebiology.biomedcentral.com/articles/10.1186/s13059-014-0531-y>
- 591 29. Riley KF, Hobson MP, Bence SJ. Eigenfunction methods for differential equations.  
592 In: Mathematical methods for physics and engineering [Internet]. Cambridge:  
593 Cambridge University Press; 2002 [cited 2018 Jul 5]. p. 581–607. Available from:  
594 [https://www.cambridge.org/core/product/identifier/CBO9781139164979A170/type/bo](https://www.cambridge.org/core/product/identifier/CBO9781139164979A170/type/book_part)  
595 [ok\\_part](https://www.cambridge.org/core/product/identifier/CBO9781139164979A170/type/book_part)
- 596 30. Riley KF, Hobson MP, Bence SJ. Series and limits. In: Mathematical methods for  
597 physics and engineering [Internet]. Cambridge: Cambridge University Press; 2002  
598 [cited 2018 Jul 5]. p. 118–53. Available from:  
599 [https://www.cambridge.org/core/product/identifier/CBO9781139164979A034/type/bo](https://www.cambridge.org/core/product/identifier/CBO9781139164979A034/type/book_part)  
600 [ok\\_part](https://www.cambridge.org/core/product/identifier/CBO9781139164979A034/type/book_part)
- 601 31. Kass RE, Raftery AE. Bayes factors. J Am Stat Assoc [Internet]. 1995 Jun [cited  
602 2017 Nov 1];90(430):773–95. Available from:  
603 <http://www.tandfonline.com/doi/abs/10.1080/01621459.1995.10476572>
- 604 32. Mustaev A, Malik M, Zhao X, Kurepina N, Luan G, Oppegard LM, et al.  
605 Fluoroquinolone-gyrase-DNA complexes. J Biol Chem [Internet]. 2014 May 2 [cited  
606 2017 Sep 21];289(18):12300–12. Available from:

- 607 <http://www.ncbi.nlm.nih.gov/pubmed/24497635>
- 608 33. Spizek J, Rezanka T. Lincomycin, clindamycin and their applications. Appl Microbiol  
609 Biotechnol [Internet]. 2004 May 5 [cited 2017 Sep 21];64(4):455–64. Available from:  
610 <http://www.ncbi.nlm.nih.gov/pubmed/14762701>
- 611 34. Thomas C, Stevenson M, Riley T V. Antibiotics and hospital-acquired *Clostridium*  
612 *difficile*-associated diarrhoea: a systematic review. J Antimicrob Chemother  
613 [Internet]. 2003 Jun 1 [cited 2017 Nov 8];51(6):1339–50. Available from:  
614 <http://www.ncbi.nlm.nih.gov/pubmed/12746372>
- 615 35. Gibbs T, Grilli J, Rogers T, Allesina S. The effect of population abundances on the  
616 stability of large random ecosystems. 2017 Aug 29 [cited 2018 Jun 21]; Available  
617 from: <http://arxiv.org/abs/1708.08837>
- 618 36. Bunin G. Ecological communities with Lotka-Volterra dynamics. Phys Rev E  
619 [Internet]. 2017 Apr 28;95(4):042414. Available from:  
620 <http://link.aps.org/doi/10.1103/PhysRevE.95.042414>
- 621 37. Bergan T, Thorsteinsson SB, Solberg R, Bjornskau L, Kolstad IM, Johnsen S.  
622 Pharmacokinetics of ciprofloxacin: intravenous and increasing oral doses. Am J Med  
623 [Internet]. 1987 Apr 27 [cited 2017 Oct 27];82(4A):97–102. Available from:  
624 <http://www.ncbi.nlm.nih.gov/pubmed/3578334>
- 625 38. Leigh DA. Antibacterial activity and pharmacokinetics of clindamycin. J Antimicrob  
626 Chemother [Internet]. Oxford University Press; 1981 Jan 1 [cited 2017 Oct  
627 27];7(Supplement A):3–9. Available from: [https://academic.oup.com/jac/article-](https://academic.oup.com/jac/article-lookup/doi/10.1093/jac/7.suppl_A.3)  
628 [lookup/doi/10.1093/jac/7.suppl\\_A.3](https://academic.oup.com/jac/article-lookup/doi/10.1093/jac/7.suppl_A.3)
- 629 39. Wade WG. The oral microbiome in health and disease. Pharmacol Res [Internet].

- 630 2013 Mar [cited 2015 Apr 12];69(1):137–43. Available from:  
631 <http://www.sciencedirect.com/science/article/pii/S1043661812002277>
- 632 40. Llewelyn MJ, Fitzpatrick JM, Darwin E, SarahTonkin-Crine, Gorton C, Paul J, et al.  
633 The antibiotic course has had its day. *BMJ* [Internet]. British Medical Journal  
634 Publishing Group; 2017 Jul 26 [cited 2017 Nov 8];358:j3418. Available from:  
635 <http://www.ncbi.nlm.nih.gov/pubmed/28747365>
- 636 41. van Schaik W. The human gut resistome. *Philos Trans R Soc B Biol Sci* [Internet].  
637 2015 Apr 27 [cited 2017 May 19];370(1670):20140087. Available from:  
638 <http://rstb.royalsocietypublishing.org/cgi/doi/10.1098/rstb.2014.0087>
- 639 42. Rognes T, Flouri T, Nichols B, Quince C, Mahé F. VSEARCH: a versatile open  
640 source tool for metagenomics. *PeerJ* [Internet]. PeerJ Inc.; 2016 Oct 18 [cited 2016  
641 Dec 2];4:e2584. Available from: <https://peerj.com/articles/2584>
- 642 43. Wang Q, Garrity GM, Tiedje JM, Cole JR. Naive Bayesian classifier for rapid  
643 assignment of rRNA sequences into the new bacterial taxonomy. *Appl Environ*  
644 *Microbiol* [Internet]. American Society for Microbiology; 2007 Aug [cited 2016 Dec  
645 21];73(16):5261–7. Available from: <http://www.ncbi.nlm.nih.gov/pubmed/17586664>
- 646 44. Faith DP. Conservation evaluation and phylogenetic diversity. *Biol Conserv*  
647 [Internet]. 1992 [cited 2017 Mar 3];61(1):1–10. Available from:  
648 <http://linkinghub.elsevier.com/retrieve/pii/0006320792912013>
- 649 45. Kembel SW, Cowan PD, Helmus MR, Cornwell WK, Morlon H, Ackerly DD, et al.  
650 *picante*: R tools for integrating phylogenies and ecology. *Bioinformatics* [Internet].  
651 Oxford University Press; 2010 Jun 1 [cited 2017 Oct 27];26(11):1463–4. Available  
652 from: <https://academic.oup.com/bioinformatics/article->

- 653            [lookup/doi/10.1093/bioinformatics/btq166](https://doi.org/10.1093/bioinformatics/btq166)
- 654    46.    Price MN, Dehal PS, Arkin AP. FastTree 2--approximately maximum-likelihood trees  
655            for large alignments. PLoS One [Internet]. 2010 Jan 10 [cited 2014 Jul  
656            10];5(3):e9490. Available from:  
657            <http://journals.plos.org/plosone/article?id=10.1371/journal.pone.0009490>
- 658    47.    Sievers F, Wilm A, Dineen D, Gibson TJ, Karplus K, Li W, et al. Fast, scalable  
659            generation of high-quality protein multiple sequence alignments using Clustal  
660            Omega. Mol Syst Biol [Internet]. 2011 Oct 11 [cited 2017 Oct 4];7(1):539. Available  
661            from: <http://msb.embopress.org/cgi/doi/10.1038/msb.2011.75>
- 662    48.    Carpenter B, Gelman A, Hoffman MD, Lee D, Goodrich B, Betancourt M, et al. Stan:  
663            a probabilistic programming language. J Stat Softw [Internet]. 2017 Jan 11 [cited  
664            2017 Oct 27];76(1):1–32. Available from: <http://www.jstatsoft.org/v76/i01/>
- 665    49.    Stan Development Team. RStan: the R interface to Stan. [Internet]. 2017. Available  
666            from: <http://mc-stan.org/rstan/>
- 667    50.    Aitkin M. Posterior Bayes factors. J R Stat Soc Ser B [Internet]. WileyRoyal  
668            Statistical Society; 1991 [cited 2017 Oct 27];53:111–42. Available from:  
669            <https://www.jstor.org/stable/2345730>
- 670    51.    Gronau QF, Singmann H, Wagenmakers E-J. bridgesampling: an R package for  
671            estimating normalizing constants. arXiv [Internet]. 2017 Oct 23 [cited 2017 Nov  
672            14];1710.08162. Available from: <http://arxiv.org/abs/1710.08162>

673

## 674 **Figure legends**

### 675 **Figure 1. A stability landscape framework for antibiotic perturbation to the**

676 **microbiome.** We represent the gut microbiome as a unit mass on a stability landscape,  
677 where height corresponds to phylogenetic diversity. (A) The healthy human microbiome  
678 can be conceptualised as resting in the equilibrium of a stability landscape of all possible  
679 states of the microbiome. Perturbations can displace it from this equilibrium value into  
680 alternative states (adapted from Lloyd-Price et al. (25)). (B) Choosing to parameterise this  
681 stability landscape using diversity, we assume that there are just two states: the healthy  
682 baseline state and an alternative stable state. (C) Perturbation to the microbiome (e.g. by  
683 antibiotics) is then modelled as an impulse, which assumes the duration of the perturbation  
684 is short relative to the overall timescale of the experiment. We consider the form of the  
685 diversity time-response under two scenarios: a return to the baseline diversity; and a  
686 transition to a different value of a diversity (i.e. an alternative stable state).

### 687 **Figure 2. The model captures the dynamics of recovery for the gut and oral**

688 **microbiomes after antibiotics.** Bayesian fits for participants taking either a placebo (blue;  
689 n=21/22 for gut/oral), ciprofloxacin (green; n=9), clindamycin (red; n=9), minocycline  
690 (purple; n=10), and amoxicillin (orange; n=12). The mean phylogenetic diversity from 100  
691 bootstraps for each sample (black points) and median and 95% credible interval from the  
692 posterior distribution (bold and dashed coloured lines, respectively). The grey line  
693 indicates the equilibrium diversity value, defined on a per-individual basis relative to the  
694 mean baseline diversity. The biased skew of residuals after a year in certain treatment  
695 groups suggests the possibility of a transition to an alternative stable state with a different  
696 value of diversity.

697 **Figure 3: A model with a possible state transition is better supported for**  
698 **clindamycin and ciprofloxacin.** Bayesian fits for participants taking either ciprofloxacin  
699 (green; n=9), clindamycin (red; n=9), minocycline (purple; n=10), and amoxicillin (orange;  
700 n=12). The mean phylogenetic diversity from 100 bootstraps for each sample (black  
701 points) and median and 95% credible interval from the posterior distribution (bold and  
702 dashed coloured lines, respectively). The grey line indicates the equilibrium diversity value,  
703 defined on a per-individual basis relative to the mean baseline diversity. The non-zero-  
704 centred asymptotes indicates support for a state transition in both the gut and oral  
705 microbiomes after ciprofloxacin and clindamycin. See Table 2 for Bayes Factors  
706 comparing model 2 to model 1.

707 **Figure 4: Posterior parameter estimates for model with a possible transition to an**  
708 **alternative stable state.** The posterior distributions from Bayesian fits of model 2 (eq. 7)  
709 to empirical data from the gut (solid) and oral microbiomes (dashed) of individuals who  
710 received ciprofloxacin (green), clindamycin (red), minocycline (purple), and amoxicillin  
711 (orange).

712



713 **Tables**

| Antibiotic treatment group | n (gut microbiome) | n (oral microbiome) |
|----------------------------|--------------------|---------------------|
| Placebo                    | 22                 | 21                  |
| Ciprofloxacin              | 9                  | 9                   |
| Clindamycin                | 9                  | 9                   |
| Minocycline                | 10                 | 10                  |
| Amoxicillin                | 12                 | 12                  |

714 **Table 1. Number of individuals in each treatment group.** Only individuals with a complete set of 6  
 715 samples with >1,000 reads in each were retained for model fitting. For demographic characteristics of the  
 716 complete treatment groups see Table 1 of Zaura et al. (3).

| Antibiotic treatment group | Gut microbiome | Oral microbiome |
|----------------------------|----------------|-----------------|
| Ciprofloxacin              | <b>3.06</b>    | <b>16.87</b>    |
| Clindamycin                | <b>10.94</b>   | <b>7.47</b>     |
| Minocycline                | 2.11           | 2.42            |
| Amoxicillin                | 1.51           | 1.31            |

717 **Table 2. Bayes factors for model comparisons for each antibiotic group.** The Bayes factor (BF) allows  
 718 model selection, here for model 2 (with a state transition) against model 1 (no state transition). Following  
 719 Kass and Raftery, we interpret BF>3 as positive evidence in favour of model 2 (31).

| Microbiome | Antibiotic    | D      |              | A      |               | Phi1   |               | Phi2   |               |
|------------|---------------|--------|--------------|--------|---------------|--------|---------------|--------|---------------|
|            |               | Median | 95% CI       | Median | 95% CI        | Median | 95% CI        | Median | 95% CI        |
| Gut        | Ciprofloxacin | 7.9    | (5.47--9.75) | 0.8    | (0.28--1.34)  | -0.2   | (-0.69--0.16) | 0.41   | (0.05--0.92)  |
|            | Clindamycin   | 8.45   | (6.23--9.84) | 0.84   | (0.29--1.42)  | 0      | (-0.46--0.34) | 0.56   | (0.23--1.11)  |
|            | Amoxicillin   | 1.34   | (0.13--6.56) | -0.03  | (-0.66--0.56) | -1.53  | (-1.96--0.31) | 0.09   | (-1.58--1.83) |
|            | Minocycline   | 2.74   | (1.54--7.82) | -0.23  | (-1.09--0.23) | 0.33   | (-1.44--1.29) | 1.65   | (1.01--1.97)  |
| Oral       | Ciprofloxacin | 2.99   | (1.86--5.23) | -0.63  | (-1.21--0.19) | 0.19   | (-0.85--0.96) | 1.56   | (0.84--1.96)  |
|            | Clindamycin   | 3.56   | (2.33--5.77) | -0.73  | (-1.44--0.14) | 0.66   | (-0.33--1.37) | 1.61   | (1.02--1.96)  |
|            | Amoxicillin   | 4.24   | (0.41--9.26) | -0.13  | (-1.01--0.71) | -1.58  | (-1.96--0.46) | -0.33  | (-1.45--1.69) |
|            | Minocycline   | 3.38   | (0.70--8.85) | 0.53   | (-0.50--1.55) | -0.73  | (-1.87--1.19) | 1.27   | (-0.63--1.94) |

720 **Table 3. Median and 95% credible intervals for all model parameters for each treatment group.**

721 Results from Bayesian fitting of the full model (model 2) to each of the eight possible treatment groups (4  
722 antibiotics x 2 microbiomes).

## 723 **Supplemental Information: Legends**

724 **Supplementary File 1: Supplementary-Figure-1.pdf. Differences in individual**

725 **response over time for the top twelve most abundant taxonomic families for**

726 **placebo, clindamycin, and ciprofloxacin.** Relative abundances (log-scale) of the top

727 twelve most abundant bacterial families plotted at each sampled timepoint. Observations

728 are linked by coloured lines for each individual. Despite some consistency in changes

729 between antibiotics across individuals, there is inter-individual variability and evidence of

730 possible interactions between bacterial families.

731 **Supplementary File 2: Shaw-et-al-analysis.Rmd. All main analyses.** R markdown

732 notebook for reproduction of the results in this paper, containing all analysis code. If run

733 using Supplementary Files 3—6 this notebook produces: data files of bootstrapped

734 phylogenetic diversity for all individuals; model fits; and resulting figures. A full archive

735 including cached model fits and results is available on FigShare:

736 <https://figshare.com/s/d62d6e90f96dc63c2769> (doi available pending publication).

737 **Supplementary File 3: gut-data-phyloseq.rds. R phyloseq object containing**

738 **reanalyzed gut microbiome data.**

739 **Supplementary File 4: oral-data-phyloseq.rds. R phyloseq object containing**

740 **reanalyzed oral microbiome data.**

741 **Supplementary File 5: model1.stan. Stan code for defining and fitting Model 1.**

742 **Supplementary File 6: model2.stan. Stan code for defining and fitting Model 2.**

- 743 **Supplementary File 7: Lotka-Volterra-supplementary.pdf. Details of Lotka-Volterra**  
744 **model simulations.** Detailed text and discussion reporting numerical simulations  
745 investigating behaviour predicted from the stability landscape framework using a Lotka-  
746 Volterra model in 3 dimensions.
- 747 **Supplementary File 8: Lotka-Volterra-notebook.nb. Mathematica notebook of Lotka-**  
748 **Volterra simulations.** Interactive notebook containing code necessary to reproduce the  
749 analysis and figures in Supplementary File 7.

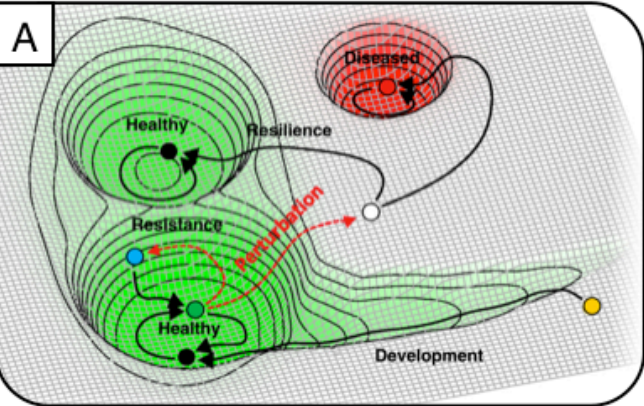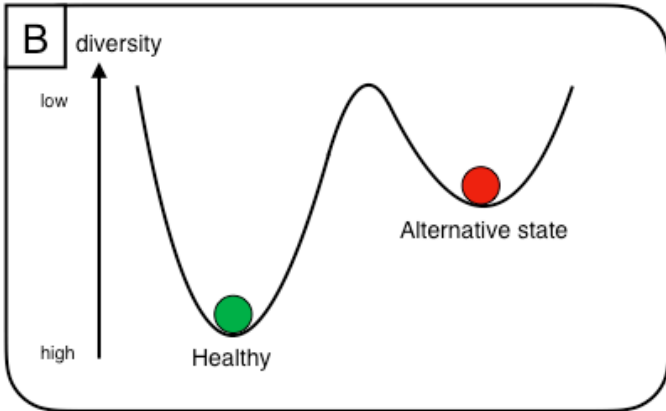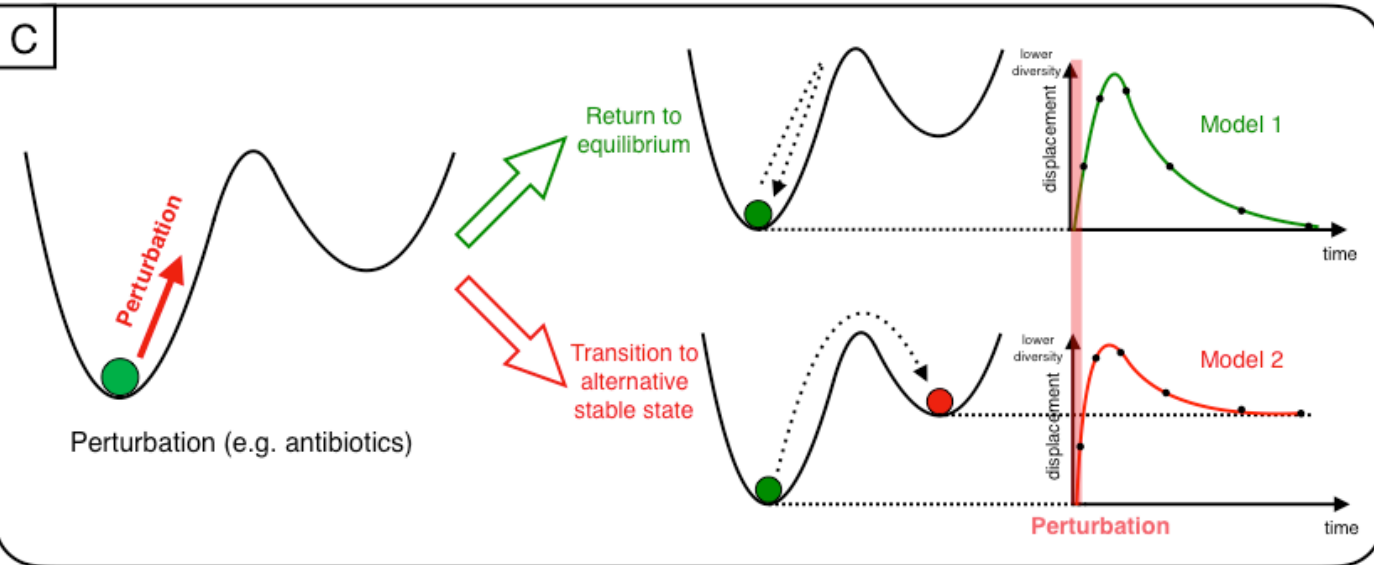

Displacement from  
equilibrium

lower  
diversity  
higher  
diversity

Placebo

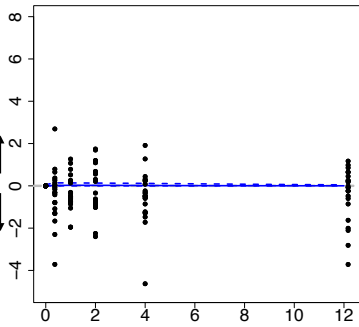

Ciprofloxacin

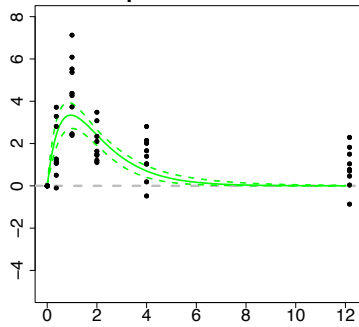

Clindamycin

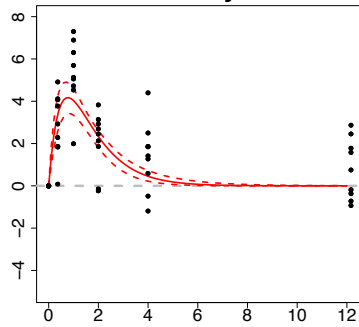

Minocycline

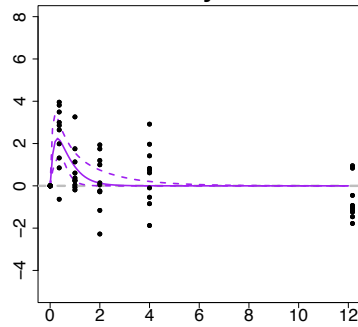

Amoxicillin

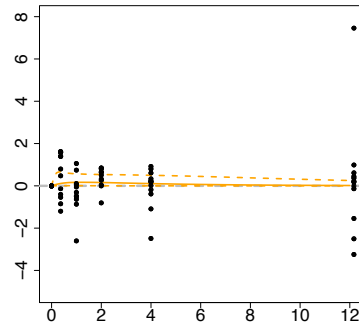

Gut

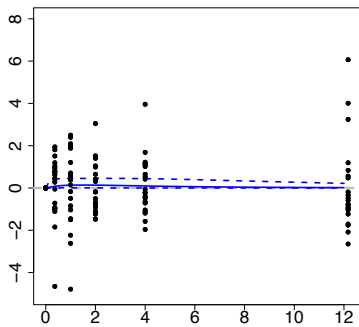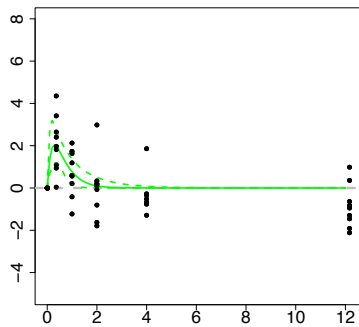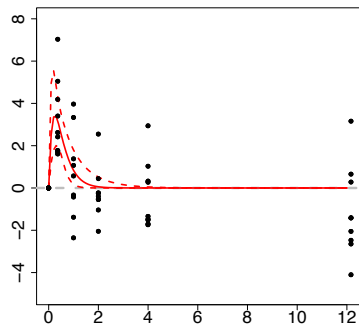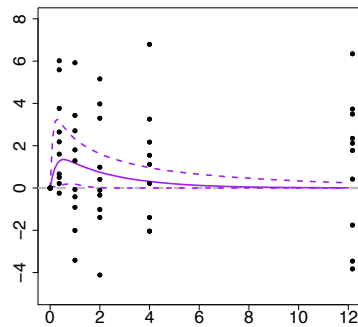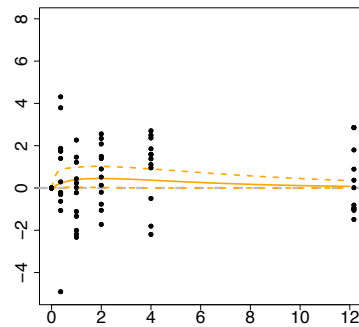

Oral

Months

Displacement from  
equilibrium

Ciprofloxacin

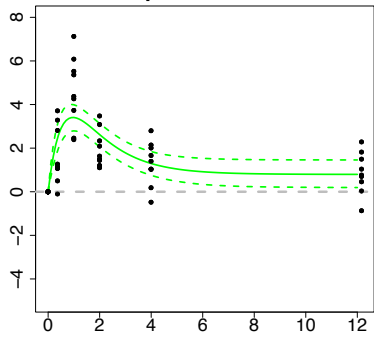

Clindamycin

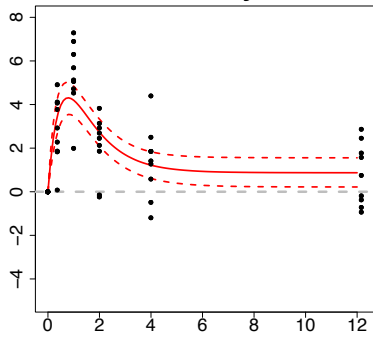

Minocycline

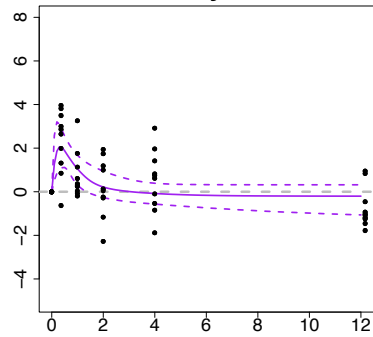

Amoxicillin

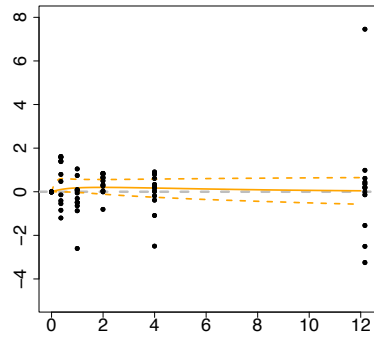

Gut

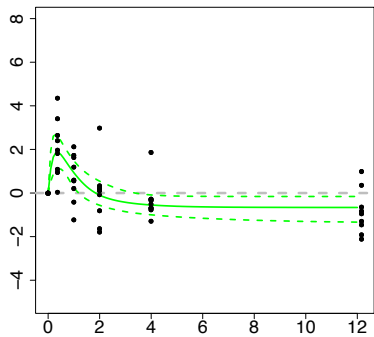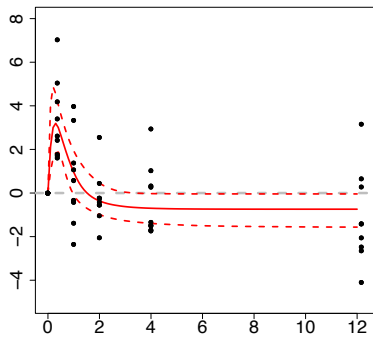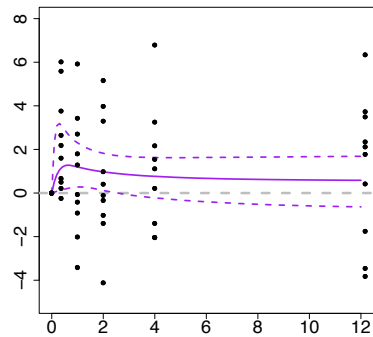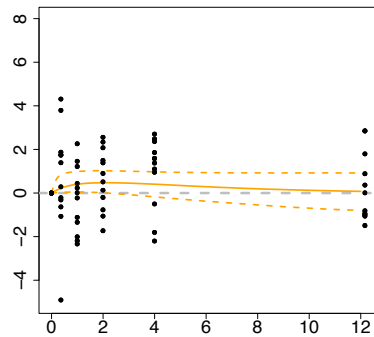

Oral

Months

Posterior density

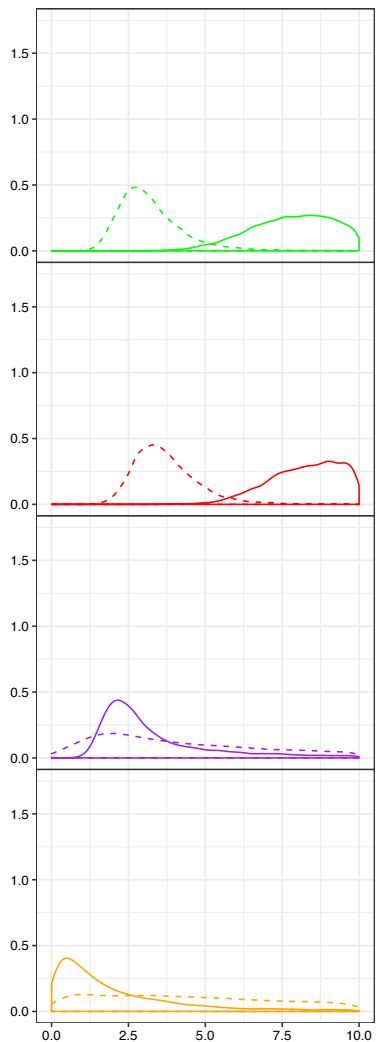

$D$

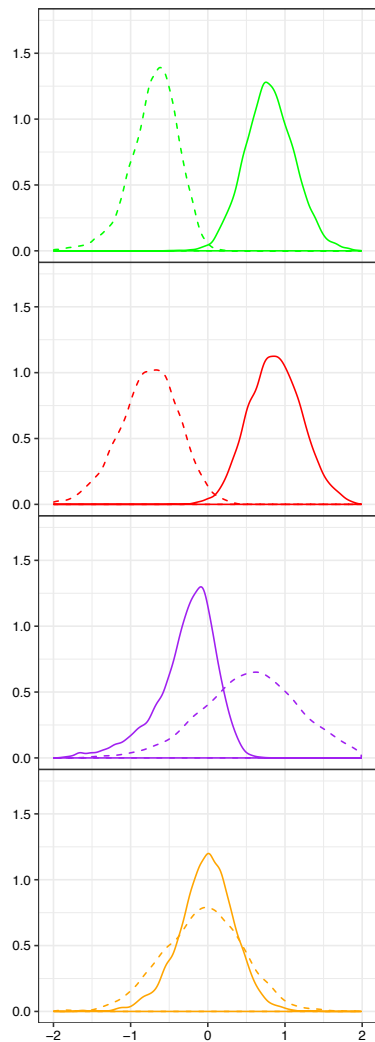

$A$

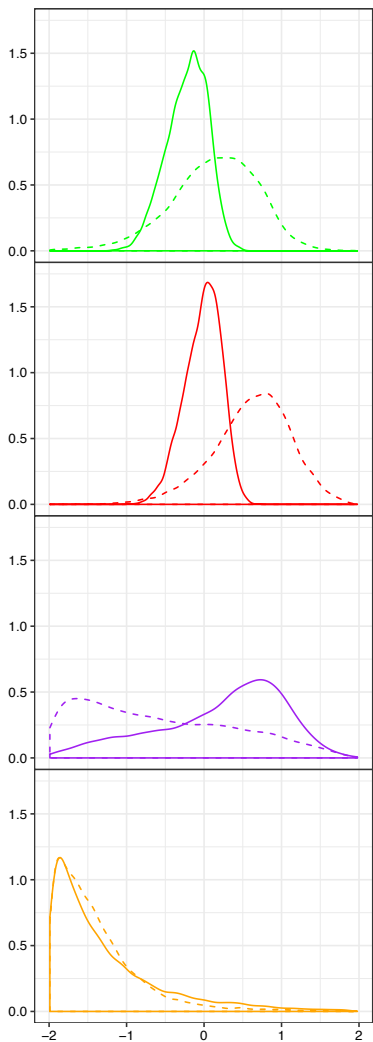

$\Phi_1$

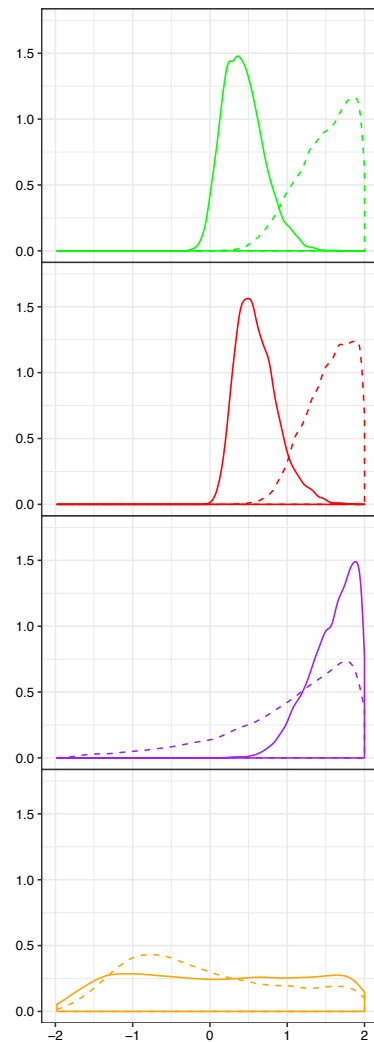

$\Phi_2$

Ciprofloxacin

Clindamycin

Minocycline

Amoxicillin

Parameter

# Placebo (n=10)

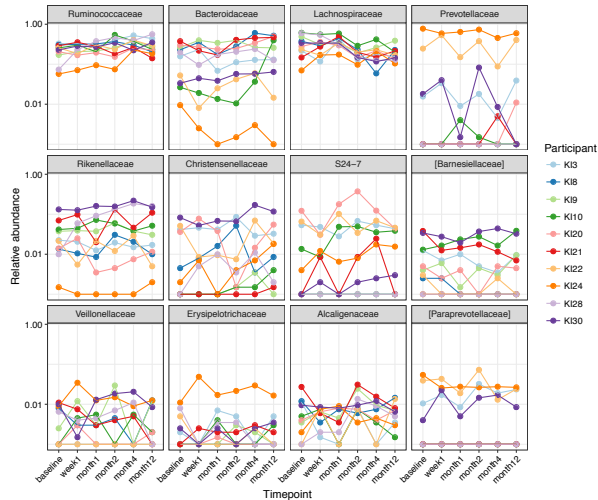

# Clindamycin (n=9)

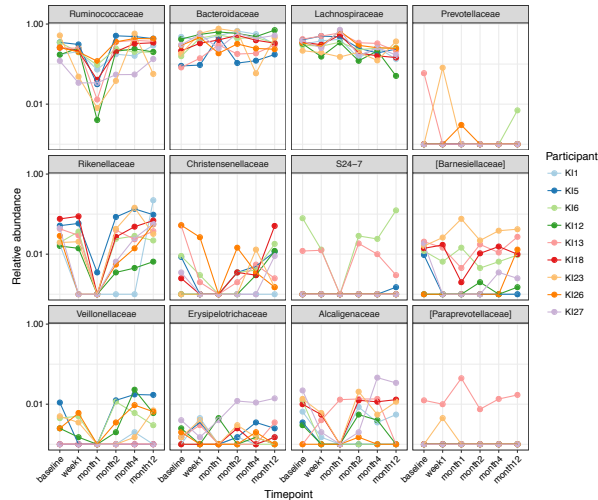

# Ciprofloxacin (n=9)

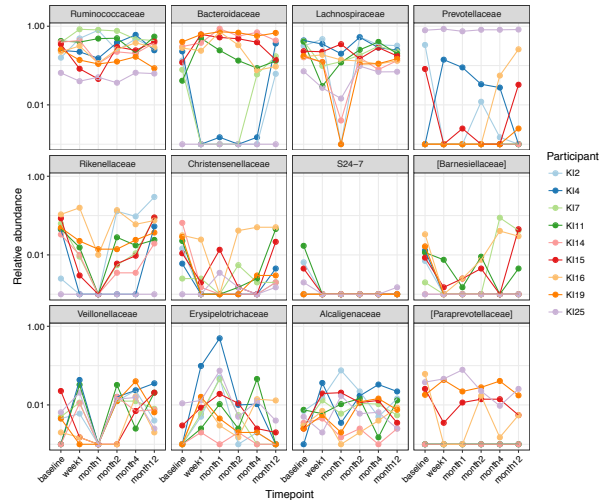

Source: https://www.biorxiv.org/content/10.1101/222398v2.full.pdf
